# Supplementary material for: Enriching Electronic Health Records with Social Determinants of Health Data from Consumer Database: A Comparative Fit-for-Use Study
Source: Research Square preprint supplement (doi:10.21203/rs.3.rs-5349886/v1), 2025-03-21
Supplement: Supplementary file 1 [file 16748e4d036e8b53b24ee849.docx]

**SUPPLEMENTAL APPENDIX C – Concordance Analysis (Race, Ethnicity)**

| **Table C.1. Cross-tabulation of RACE (EHR) by P_ETHNIC_GRP (I-SDH Vendor)** | | | | | | | | |
| --- | --- | --- | --- | --- | --- | --- | --- | --- |
| **RACE (EHR)** | **P_ETHNIC_GRP (I-SDH)** | | | | | | | |
| **Unknown** | **Asian** | **Black** | **Hispanic** | **American Indian** | **Portuguese** | **White** | **Total** |
| **Unknown/Refused** | 10688 | 564 | 342 | 1164 | 106 | 24 | 6767 | 19655 |
| *54.38* | *2.87* | *1.74* | *5.92* | *0.54* | *0.12* | *34.43* | *Row%* |
| *3.92* | *7.32* | *2.74* | *9.67* | *2.48* | *5.1* | *1.96* | *Col%* |
| **American Indian/Alaskan Native** | 423 | 24 | 18 | 53 | 37 | 2 | 398 | 955 |
| *44.29* | *2.51* | *1.88* | *5.55* | *3.87* | *0.21* | *41.68* | *Row%* |
| *0.16* | *0.31* | *0.14* | *0.44* | *0.86* | *0.42* | *0.12* | *Col%* |
| **Asian** | 6079 | 4325 | 35 | 191 | 12 | 10 | 981 | 11633 |
| *52.26* | *37.18* | *0.3* | *1.64* | *0.1* | *0.09* | *8.43* | *Row%* |
| *2.23* | *56.17* | *0.28* | *1.59* | *0.28* | *2.12* | *0.28* | *Col%* |
| **Black/African American** | 24246 | 123 | 5854 | 338 | 65 | 30 | 14031 | 44687 |
| *54.26* | *0.28* | *13.1* | *0.76* | *0.15* | *0.07* | *31.4* | *Row%* |
| *8.89* | *1.6* | *46.85* | *2.81* | *1.52* | *6.37* | *4.06* | *Col%* |
| **Hawaiian/Pacific Islander** | 260 | 29 | 3 | 34 | 1 | 8 | 90 | 425 |
| *61.18* | *6.82* | *0.71* | *8* | *0.24* | *1.88* | *21.18* | *Row%* |
| *0.1* | *0.38* | *0.02* | *0.28* | *0.02* | *1.7* | *0.03* | *Col%* |
| **White** | 221711 | 1880 | 6074 | 7667 | 4034 | 366 | 321570 | 563302 |
| *39.36* | *0.33* | *1.08* | *1.36* | *0.72* | *0.06* | *57.09* | *Row%* |
| *81.31* | *24.42* | *48.62* | *63.67* | *94.3* | *77.71* | *93.02* | *Col%* |
| **Other** | 9250 | 755 | 168 | 2594 | 23 | 31 | 1851 | 14672 |
| *63.05* | *5.15* | *1.15* | *17.68* | *0.16* | *0.21* | *12.62* | *Row%* |
| *3.39* | *9.81* | *1.34* | *21.54* | *0.54* | *6.58* | *0.54* | *Col%* |
| **Total** | 272657 | 7700 | 12494 | 12041 | 4278 | 471 | 345688 | 655329 |

| **Table C.2. Cross-tabulation of HISPANIC (EHR) by P_HISPANIC_LANG (I-SDH Vendor)** | | | | | | |
| --- | --- | --- | --- | --- | --- | --- |
| **HISPANIC (EHR)** | **P_HISPANIC_LANG (I-SDH)** | | | | | | |
| **Unknown** | **Bilingual** | **English** | **Spanish** | **Non-Hisp** | **Total** | |
| **Unknown** | 17648 | 206 | 690 | 305 | 24990 | 43839 | |
| *40.26* | *0.47* | *1.57* | *0.7* | *57* | *Row%* | |
| *8.28* | *7.79* | *6.74* | *7.31* | *5.88* | *Col%* | |
| **No** | 188411 | 902 | 6697 | 3320 | 396492 | 595822 | |
| *31.62* | *0.15* | *1.12* | *0.56* | *66.55* | *Row%* | |
| *88.36* | *34.13* | *65.39* | *79.6* | *93.28* | *Col%* | |
| **Yes** | 7178 | 1535 | 2855 | 546 | 3554 | 15668 | |
| *45.81* | *9.8* | *18.22* | *3.48* | *22.68* | *Row%* | |
| *3.37* | *58.08* | *27.88* | *13.09* | *0.84* | *Col%* | |
| **Total** | 213237 | 2643 | 10242 | 4171 | 425036 | 655329 | |
