# Supplementary material for: Enriching Electronic Health Records with Social Determinants of Health Data from Consumer Database: A Comparative Fit-for-Use Study
Source: Research Square preprint supplement (doi:10.21203/rs.3.rs-5349886/v1), 2025-03-21
Supplement: Supplementary file 2 [file 8a003c83e2895a16ebdee453.docx]

## SUPPLEMENTAL APPENDIX F – Community Characteristics of the Cohort

| **Variables** | **All** | **With  readmission** | **Without readmission** | **P-val** |
| --- | --- | --- | --- | --- |
| N | 67,806 | 7,161 | 60,645 |  |
| **Area Deprivation Index, median (IQR)** | | | | |
| National Ranking (1 – 100) | 69 (55, 84) | 72 (57, 87) | 69 (55, 84) | < 0.001 |
| State Ranking (1 – 10) | 5 (3, 8) | 6 (4, 8) | 5 (3, 8) | < 0.001 |
| **Rural-Urban Commuting Area** | | | | |
| 1: Metropolitan area core: primary flow within an urbanized area (UA) | 11666 (17.2%) | 1380 (19.3%) | 10286 (17%) | < 0.001 |
| 2: Metropolitan area high commuting: primary flow 30% or more to a UA | 6095 (9%) | 515 (7.2%) | 5580 (9.2%) |
| 3: Metropolitan area low commuting: primary flow 10% to 30% to a UA | 903 (1.3%) | 88 (1.2%) | 815 (1.3%) |
| 4: Micropolitan area core: primary flow within an urban cluster of 10,000 to 49,999 (large UC) | 8344 (12.3%) | 1022 (14.3%) | 7322 (12.1%) |
| 5: Micropolitan high commuting: primary flow 30% or more to a large UC | 4118 (6.1%) | 364 (5.1%) | 3754 (6.2%) |
| 6: Micropolitan low commuting: primary flow 10% to 30% to a large UC | 179 (0.3%) | 14 (0.2%) | 165 (0.3%) |
| 7: Small town core: primary flow within an urban cluster of 2,500 to 9,999 (small UC) | 6435 (9.5%) | 5653 (9.3%) | 782 (10.9%) |
| 8: Small town high commuting: primary flow 30% or more to a small UC | 848 (1.2%) | 784 (1.3%) | 64 (0.9%) |
| 9: Small town low commuting: primary flow 10% to 30% to a small UC | 56 (0.1%) | <11 (0.1%) | 52 (0.1%) |
| 10: Rural areas: primary flow to a tract outside a UA or UC | 6014 (8.9%) | 567 (7.9%) | 5447 (9%) |
| **Medically Underserved Area** | | | | |
| Index of medical underserved score, mean (sd) | 56.1 (7.5) | 57.6 (2.1) | 55.9 (7.9) | 0.2509 |
| **American Community Survey, median (IQR)** | | | | |
| **Income** | | | | |
| % of households receiving public assistance income or FOOD STAMPS/SNAP in past 12 months | 10.9 (7.4,15.3) | 12.39 (8.7,17.7) | 0.72 (7.4,15.2) | < 0.001 |
| % of workers 16 years and older in community where patient resides whose income is below 100 % of poverty level | 6.39 (4.25,11.79) | 7.18 (4.59,12.5) | 6.39 (4.25,11.68) | < 0.001 |
| % of workers 16 years and older in community where patient resides whose income is between 100 % and 150% of poverty level | 6.03 (4.15,9.82) | 6.33 (4.34,9.8875) | 6.03 (4.14,9.78) | < 0.001 |
| % of workers 16 years and older in community where patient resides whose income is greater than or equal to 150% of poverty level | 86.85 (79.72,90.97) | 85.79 (74.59,90.44) | 86.92 (80.11,90.97) | < 0.001 |
| **Transportation** | | | | |
| % of workers over 16 years whose means of transportation is public transportation excluding taxicab | 0(0,0.54) | 0(0,0.61) | 0(0,0.53) | < 0.001 |
| % of workers over 16 years whose means of transportation is bicycle | 0(0,0.19) | 0(0,0.29) | 0(0,0.18) | < 0.001 |
| % of workers over 16 years whose means of transportation is walking | 1.39(0.4,2.7) | 1.48(0.4,2.9) | 1.39(0.4,2.7) | < 0.001 |
| % of workers over 16 years whose means of transportation is car, truck or van | 92.43(88.77,94.66) | 92.28(88.75,94.57) | 92.43 (88.77,94.66) | < 0.001 |
| Travel [Time] to work of workers over 16 years who do not work at home | 35370(24650,39835) | 35370(23535,36615) | 35370(24650,40845) | < 0.001 |
| **Occupation/Employment** | | | | |
| % of workers over 16 years who work in agriculture, forestry, fishing, hunting or mining | 1.63(0.36,4.19) | 1.36(0.34,2.87) | 1.63(0.36,4.43) | < 0.001 |
| % of workers over 16 years who work in construction | 6.13(4.07,9.25) | 5.92(4.07,8.78) | 6.13(4.07,9.25) | < 0.001 |
| % of workers over 16 years who work in manufacturing | 11.05(7.38,15.25) | 11.15(7.16,14.93) | 11.05(7.38,15.27) | 0.0544 |
| % of workers over 16 years who work in wholesale trade | 1.92(1.12,2.74) | 1.81(0.82,2.73) | 1.92(1.12,2.75) | < 0.001 |
| % of workers over 16 years who work retail trade | 11.4(9.4,15) | 11.39(9.4,14.8525) | 11.4(9.4,15) | 0.8323 |
| % of workers over 16 years who work in transportation, warehousing or utilities | 5.11(3.44,6.61) | 4.94(3.33,6.54) | 5.11(3.44,6.61) | 0.0069 |
| % of workers over 16 years who work in information | 1.23(0.63,2.38) | 1.23(0.59,2.3525) | 1.23(0.63,2.38) | < 0.001 |
| % of workers over 16 years who work in real estate, rental or leasing | 5.1(3.63,7.21) | 5.25(3.52,7.18) | 5.04(3.63,7.21) | 0.1602 |
| % of workers over 16 years who work in professional scientific, management, administrative or waste management | 5.95(4.3,7.9) | 5.95(4.3,7.74) | 5.95(4.3,7.98) | 0.0119 |
| % of workers over 16 years who work in educational services, health care or social assistance | 25.23(21.83,30.48) | 26.15(21.95,30.99) | 25.18(21.83,30.41) | < 0.001 |
| % of workers over 16 years who work in arts, entertainment, recreation, accommodation or food services | 7.37(4.88,9.75) | 7.89(5.11,10.31) | 7.23(4.81,9.5225) | < 0.001 |
| % of workers over 16 years who work in other services excluding public administration | 4.11(2.93,5.21) | 4.1(2.92,5.15) | 4.12(2.93,5.23) | 0.0385 |
| % of workers over 16 years who work in public administration | 5.02(3.1,6.98) | 4.94(3,6.79) | 5.02(3.1,6.98) | < 0.001 |
| % of workers over 16 years who work in armed forces | 0(0,0.06) | 0(0,0.24) | 0(0,0) | 0.2361 |
| % of workers 18 to 64 years who are employed in the labor force | 77.24(72.5,80.68) | 76.34(72.25,79.96) | 77.24(72.5,80.89) | < 0.001 |
| **Demographic** | | | | |
| % of residents who are male | 49.07(47.48,51.68) | 48.81(47.12,51.45) | 49.16(47.48,51.68) | < 0.001 |
| % of residents who are female | 50.93(48.32,52.52) | 51.19(48.55,52.8425) | 50.84(48.32,52.52) | < 0.001 |
| % of residents who report being white alone and not Hispanic or Latino | 88.61(81.94,94.22) | 86.55(80.485,93.28) | 88.61(82.6425,94.57) | < 0.001 |
| % of residents who report being Hispanic or Latino | 2.41(1.17,3.83) | 2.47(1.36,3.83) | 2.41(1.17,3.83) | 0.0058 |
| % of residents who report being black or African American alone | 0.86(0.6,1.28) | 0.9(0.6,1.28) | 0.85(0.6,1.28) | < 0.001 |
| % of residents who report being american indian or alaska native alone | 0.17(0,0.86) | 0.17(0,0.88) | 0.17(0,0.83) | 0.1212 |
| % of residents who report being asian alone | 0.39(0,1.47) | 0.46(0,1.48) | 0.39(0,1.47) | 0.3369 |
| % of residents who report being native Hawaiian or Pacific Islander alone | 0(0,0) | 0(0,0) | 0(0,0) | 0.2768 |
| % of residents who report having two or more racial origins | 2.05(0.96,3.75) | 2.19(1.21,3.98) | 2(0.96,3.75) | < 0.001 |
| Number Fraction] of residents who are under 18 years of age | 23.4(20.47,24.7) | 23.34(20.33,24.7) | 23.41(20.47,24.7) | 0.0014 |
| % of residents who are 18 to 24 years of age | 7.72(6.04,10.5775) | 8.01(6.4,11.6525) | 7.7(6,10.45) | < 0.001 |
| % of residents who are 25 to 64 years of age | 50.58(47.5,53.03) | 50.43(47.5,53.03) | 50.58(47.5,53.03) | 0.0063 |
| % of residents who are 65 to 79 years of age | 13.12(11.31,15.06) | 12.81(9.46,14.91) | 13.17(11.37,15.06) | < 0.001 |
| % of residents who are 80 years of age or older | 4.05(2.47,5.1) | 4.04(2.36,5.1) | 4.06(2.47,5.13) | < 0.001 |
| **Education** | | | | |
| % of residents 25 years and older who completed 5th grade or less schooling | 1.12(0.43,1.84) | 1.16(0.45,1.84) | 1.12(0.43,1.82) | < 0.001 |
| % of residents 25 years and older who completed 5th grade but did not complete high school or GED | 9.47(6.99,12.9) | 9.86(7.03,13.78) | 9.47(6.99,12.73) | < 0.001 |
| % of residents 25 years and older who completed high school or GED | 35.66(30.28,42.16) | 34.92(28.73,41.61) | 35.66(30.31,42.19) | 0.0015 |
| % of residents 25 years and older who completed some college but did not get a degree | 20.2(16.99,23.72) | 20.29(16.97,24.39) | 20.2(16.99,23.5) | 0.0079 |
| % of residents 25 years and older who completed and associates or higher college degree | 31.21(22.49,38.4) | 32.14(22.9,38.4) | 31.21(22.49,38.4) | 0.5824 |
| **Housing/Living Condition** | | | | |
| % of households with one or more types of computing devices | 85.82(82.69,90.36) | 85.64(82.02,89.96) | 85.85(82.7,90.46) | 0.0077 |
| % of households with broadband internet | 74.47(69.03,80.6) | 74.47(68.98,79.62) | 74.64(69.06,80.91) | 0.0052 |
| % of households with housing units built prior to 1970 | 61.37(44.54,70.82) | 63.81(46.32,70.93) | 60.14(44.16,70.44) | < 0.001 |
| % of households without kitchen facilities | 0.52(0,1.65) | 0.52(0,1.63) | 0.52(0,1.65) | 0.9109 |
| % of households without complete plumbing facilities | 0(0,0.64) | 0(0,0.51) | 0(0,0.64) | 0.015 |
| % of renter-occupied housing units in community where patient resides with gross rent >= 30% of household income in past 12 months | 35.18(25.59,45.79) | 39.64(27.44,48.84) | 34.9(25.59,45.79) | < 0.001 |
| Average Number [Number concentration] of persons occupying a single household | 2.48(2.3,2.65) | 2.45(2.28,2.62) | 2.48(2.3,2.65) | < 0.001 |
| **Food Access Research Atlas** | | | | |
| Share of tract population that are beyond 1/2 mile from supermarket, median (IQR) | 81.34 (66.52,99.99) | 78.27 (61.48,99.80) | 81.52 (67.27,99.99) | < 0.001 |
| Share of tract population that are beyond 1 mile from supermarket, median (IQR) | 54.32 (27.17,99.85) | 43.87 (26.59,98.71) | 60.17 (27.39,99.94) | < 0.001 |
| Share of tract population that are White beyond 1/2 miles from supermarket, median (IQR) | 70.92 (58.28,95.28) | 67.07 (53.56,92.04) | 72.26 (58.28,95.28) | < 0.001 |
| Share of tract population that are White beyond 1 miles from supermarket, median (IQR) | 46.25 (24.30,94.16) | 35.99 (24.30,92.14) | 48.31 (24.46,94.21) | < 0.001 |
| Share of tract population that are American Indian or Alaska Native beyond 1 miles from supermarket, median (IQR) | 0.002 (0, 0.086) | 0.17 (0.06,0.34) | 0.18 (0.06, 0.35) | 0.0037 |
| Share of tract population that are Asian beyond 1/2 miles from supermarket, median (IQR) | 0.36 (0.18,0.85) | 0.39 (0.19,1.01) | 0.36 (0.18,0.85) | 0.2444 |
| Share of tract population that are Asian beyond 1 miles from supermarket, median (IQR) | 0.23 (0.06, 0.51) | 0.21 (0.05,0.51) | 0.23 (0.06,0.49) | 0.5174 |
| Share of tract population that are Black or African American beyond 1/2 miles from supermarket, median (IQR) | 1.91 (0.69,5.23) | 2.56 (0.86,6.43) | 1.82 (0.69,5.14) | < 0.001 |
| Share of tract population that are Black or African American beyond 1 miles from supermarket, median (IQR) | 0.83 (0.31,1.82) | 0.98 (0.35,1.98) | 0.83 (0.31,1.82) | 0.0029 |
| Share of tract population that are Native Hawaiian or Other Pacific Islander beyond 1/2 mile from supermarket, median (IQR) | 0.003 (0,0.04) | 0.02 (0,0.05) | 0 (0,0.04) | 0.3524 |
| Share of tract population that are Native Hawaiian or Other Pacific Islander beyond 1 mile from supermarket, median (IQR) | 0 (0,0.024) | 0 (0,0.023) | 0 (0,0.025) | 0.4653 |
| Share of tract population that are Other/Multiple race beyond 1/2 mile from supermarket, median (IQR) | 1.80 (1.28,2.59) | 0.02 (0,0.05) | 0 (0,0.04) | < 0.001 |
| Share of tract population that are Other/Multiple race beyond 1 mile from supermarket, median (IQR) | 1.07 (0.53,1.78) | 1.07 (0.53,1.74) | 1.071 (0.53,1.78) | 0.096 |
| Share of tract population that are Hispanic or Latino ethnicity beyond 1/2 miles from supermarket, median (IQR) | 1.26 (0.86,1.99) | 1.39 (0.94,2.09) | 1.26 (0.85,1.99) | 0.008 |
| Share of tract population that are Hispanic or Latino ethnicity beyond 1 miles from supermarket, median (IQR) | 2.16 (1.05,4.27) | 0.75 (0.34,1.14) | 0.83 (0.35,1.22) | < 0.001 |
| Share of tract population that are kids beyond 1/2 mile from supermarket, median (IQR) | 19.45 (14.19,23.85) | 18.12 (12.53,23.10) | 19.45 (14.26,23.91) | < 0.001 |
| Share of tract population that are kids beyond 1 mile from supermarket, median (IQR) | 13.76 (5.82,23.10) | 8.85 (5.62,21.69) | 14.17 (5.82,23.10) | < 0.001 |
| Share of tract population that are low income individuals beyond 1/2 mile from supermarket, median (IQR) | 28.54 (19.70,39.06) | 28.74 (19.84,39.81) | 28.53 (19.70,38.87) | 0.0084 |
| Share of tract population that are low income individuals beyond 1 mile from supermarket, median (IQR) | 17.41 (9.85,28.67) | 16.09 (9.79,27.83) | 17.41 (9.85,28.82) | < 0.001 |
| Share of tract population that are seniors individuals beyond 1/2 mile from supermarket, median (IQR) | 11.87 (9.16,14.77) | 11.58 (8.03,14.64) | 11.95 (9.33,14.76) | < 0.001 |
| Share of tract population that are seniors individuals beyond 1 mile from supermarket, median (IQR) | 8.35 (3.76,13.04) | 6.84 (3.50,11.57) | 8.48 (3.77,13.13) | < 0.001 |
| Share of tract housing units receiving SNAP benefits count beyond 1/2 mile from supermarket | 8.06 (5.25,11.46) | 8.44 (5.29,12.52) | 8.06 (5.25,11.29) | < 0.001 |
| Share of tract housing units receiving SNAP benefits count beyond 1 mile from supermarket | 5.09 (2.83,8.86) | 4.94 (2.83,8.87) | 5.09 (2.83,8.86) | 0.7097 |
| Flag for low access tract when considering 1/2 mile distance | 22677 (33.4%) | 2722 (38%) | 19259 (31.8%) | < 0.001 |
| Flag for low access tract when considering 1 mile distance | 14932 (22%) | 1836 (25.6%) | 13096 (21.6%) | < 0.001 |
| Flag for tract where >= 100 of households do not have a vehicle, and beyond 1/2 mile from supermarket, n(%) | 9691 (14.3%) | 1224 (17.1%) | 8467 (14%) | < 0.001 |
| Flag for low-income and low access when considering low accessibilty at 1/2 and 10 miles | 14758 (21.8%) | 1917 (26.8%) | 12841 (21.2%) | < 0.001 |
| Flag of low-income and low access when considering low accessibility at 1 and 10 miles, n(%) | 9,875 (14.6%) | 1,237 (17.3%) | 8,638 (14.2%) | < 0.001 |
| Flag for low access tract at 1 mile for urban areas or 10 miles for rural areas, n(%) | 21855 (32.2%) | 2412 (33.7%) | 19443 (32.1%) | 0.016 |
| Flag for low access tract at 1 mile for urban areas or 20 miles for rural areas | 14953 (22%) | 1834 (25.6%) | 13119 (21.6%) | < 0.001 |
| Flag for low income tract | 19446 (28.7%) | 2401 (33.5%) | 17045 (28.1%) | < 0.001 |
| Tract median family income | 59583(48667,67563) | 57096(48031,66279) | 59771(49408,67593) | < 0.001 |
| Flag for urban tract | 23120 (34.1%) | 2858 (39.9%) | 20262 (33.4%) | < 0.001 |
| **Social Vulnerability Index, median (IQR)** | | | | |
| % of persons aged 17 and younger estimate, 2016-2020 ACS | 22.7 (19.6,25.5) | 22.5 (19.4,25.5) | 22.7 (19.6,25.5) | 0.0718 |
| Percentile percentage of persons aged 17 and younger estimate | 0.54 (0.35,0.71) | 0.54 (0.34,0.71) | 0.55 (0.35,0.71) | 0.0144 |
| Flag - the percentage of persons aged 17 and younger is in the 90th percentile, n (%) | 1378 (2%) | 144 (2%) | 1234 (2%) | 0.8911 |
| % of persons aged 65 and older estimate, 2016-2020 ACS | 16.3(13,20.6) | 15.7 (12.6,20.5) | 16.5 (13,20.6) | < 0.001 |
| Percentile percentage of persons aged 65 and older estimate | 0.53 (0.35,0.74) | 0.49 (0.32,0.74) | 0.54 (0.35,0.75) | < 0.001 |
| Flag - the percentage of persons aged 65 and older is in the 90th percentile, n (%) | 2879 (4.2%) | 275 (3.8%) | 2604 (4.3%) | 0.0715 |
| % of occupied housing units with more people than rooms estimate | 1 (0.2,2.6) | 1 (0,2.5) | 1.1 (0.2,2.6) | 0.0214 |
| Percentile percentage households with more people than rooms estimate | 0.38 (0.25,0.61) | 0.38 (0,0.59) | 0.40 (0.25,0.61) | 0.0011 |
| Flag - the percentage of crowded households is in the 90th percentile, n (%) | 871 (1.3%) | 81 (1.1%) | 790 (1.3%) | 0.2134 |
| % of civilian noninstitutionalized population with a disability estimate, 2016-2020 ACS | 14.9 (11.4,18.6) | 15.5 (11.6,19.1) | 14.6 (11.4,18.5) | < 0.001 |
| Percentile percentage of civilian noninstitutionalized population with a disability estimate | 0.65 (0.43,0.82) | 0.68 (0.44,0.83) | 0.63 (0.43,0.81) | < 0.001 |
| Flag - the percentage of persons with a disability is in the 90th percentile, n (%) | 7264 (10.7%) | 843 (11.8%) | 6421 (10.6%) | 0.0035 |
| % of persons in group quarters estimate | 1.2 (0,3.8) | 1.5 (0.1,4.7) | 1.2 (0,3.7) | < 0.001 |
| Percentile percentage of persons in group quarters estimate | 0.73 (0,0.88) | 0.76 (0.42,0.90) | 0.72 (0,0.88) | < 0.001 |
| Flag - the percentage of persons in group quarters is in the 90th percentile, n (%) | 13886 (20.5%) | 1876 (26.2%) | 12010 (19.8%) | < 0.001 |
| % of housing cost-burdened occupied housing units with annual income less than $75,000 (30%+ of income spent on housing costs) estimate | 21.6 (16.6,29.1) | 23.1 (17.2,29.6) | 21.6 (16.3,28.4) | < 0.001 |
| Percentile percentage of housing cost-burdened occupied housing units estimate with annual income less than $75,000 (30%+ of income spent on housing costs) estimate | 0.37 (0.20,0.61) | 0.42 (0.21,0.63) | 0.37 (0.18,0.59) | < 0.001 |
| Flag - the percentage of housing cost-burdened occupied housing units is in the 90th percentile, n (%) | 3832 (5.7%) | 537 (7.5%) | 3295 (5.4%) | < 0.001 |
| % of persons (age 5+) who speak English "less than well" estimate | 0.3 (0,1.1) | 0.3 (0,1.2) | 0.3 (0,1.1) | < 0.001 |
| Percentile percentage of persons (age 5+) who speak English "less than well" estimate | 0.29 (0,0.48) | 0.29 (0,0.50) | 0.29 (0,0.48) | 0.0022 |
| Flag - the percentage those with limited English is in the 90th percentile, n (%) | 48 (0.1%) | <11 (0.1%) | 43 (0.1%) | 0.9999 |
| % of tract population who are minoritya (estimate) | 13.4 (6.9, 22.8) | 14 (7.7, 23.4) | 13 (6.8, 22.6) | < 0.001 |
| Percentile percentage minority estimatea | 0.25 (0.12,0.40) | 0.27 (0.14,0.40) | 0.25 (0.12,0.39) | < 0.001 |
| Flag - the percentage of minority is in the 90th percentile, n (%) | 78 (0.1%) | 455 (6.3%) | 4587 (7.6%) | 0.012 |
| % mobile homes estimate | 5.2 (1.2,12.4) | 5 (1.1,11) | 5.3(1.2,12.6) | < 0.001 |
| Percentile percentage mobile homes estimate | 0.70 (0.56,0.82) | 0.70 (0.55,0.80) | 0.71 (0.56,0.82) | 0.0467 |
| Flag - the percentage of mobile homes is in the 90th percentile, n (%) | 5042 (7.4%) | <11 (0.1%) | 72 (0.1%) | 0.4648 |
| % housing in structures with 10 or more units estimate | 1.9 (0,7.7) | 2.4 (0.2,8.8) | 1.9 (0,7.5) | < 0.001 |
| Percentile percentage housing in structures with 10 or more units estimate | 0.40 (0,0.60) | 0.43 (0.27,0.62) | 0.40 (0,0.60) | < 0.001 |
| Flag - the percentage of households in multi-unit housing is in the 90th percentile, n (%) | 1568 (2.3%) | 163 (2.3%) | 1405 (2.3%) | 0.8376 |
| % of persons with no high school diploma (age 25+) estimate | 9.1 (5.35,13.1) | 9.9 (6.1,13.5) | 9.1 (5.3,13.1) | < 0.001 |
| Percentile percentage of persons with no high school diploma (age 25+) estimate | 0.5 (0.29,0.66) | 0.54 (0.33,0.67) | 0.5 (0.29,0.66) | < 0.001 |
| Flag - the percentage of persons with no high school diploma is in the 90th percentile, n (%) | 570 (0.8%) | 55 (0.8%) | 515 (0.9%) | 0.4863 |
| % of households with no vehicle available estimate | 4.3 (2.5,8.5) | 5.1 (2.8,9.2) | 4.3 (2.3,8.3) | < 0.001 |
| Percentile percentage households with no vehicle available estimate | 0.47 (0.31,0.69) | 0.52 (0.34,0.72) | 0.47 (0.29,0.69) | 0.2136 |
| Flag - the percentage of households with no vehicles is in the 90th percentile, n (%) | 2477 (3.6%) | 422 (5.9%) | 2055 (3.4%) | < 0.001 |
| % of tract population that below 150% poverty (estimate) | 22.2 (16.2, 31.1) | 25 (17.1, 32.9) | 22 (16.2, 31.1) | < 0.001 |
| Percentile percentage of persons below 150% poverty estimate | 0.60 (0.42,0.75) | 0.63 (0.46,0.78) | 0.57 (0.42,0.75) | < 0.001 |
| Flag - the percentage of persons below 150% poverty is in the 90th percentile, n (%) | 4840 (7.1%) | 630 (8.8%) | 4210 (6.9%) | < 0.001 |
| % of single-parent households with children under 18 estimate | 5.7 (3,8.7) | 6.1 (3.5,9.3) | 5.6 (3,8.5) | < 0.001 |
| Percentile percentage of single-parent households with children under 18 estimate | 0.54 (0.28,0.74) | 0.57 (0.33,0.76) | 0.53 (0.28,0.73) | < 0.001 |
| Flag - the percentage of single-parent households is in the 90th percentile | 4219 (6.2%) | 602 (8.4%) | 3617 (6%) | < 0.001 |
| Unemployment Rate estimate | 3.8 (2.2,6) | 4 (2.4,6.3) | 3.7 (2.1,5.9) | < 0.001 |
| Percentile percentage of civilian (age 16+) unemployed estimate | 0.39 (0.18,0.64) | 0.42 (0.21,0.66) | 0.38 (0.17,0.63) | < 0.001 |
| Flag - the percentage of civilian unemployed is in the 90th percentile, n (%) | 3590 (5.3%) | 543 (7.6%) | 3047 (5%) | < 0.001 |
| % uninsured in the total civilian noninstitutionalized population estimate | 8.7 (5.1,12.2) | 8.8 (5.6,12.8) | 8.7 (5.1,12.2) | 0.0194 |
| Percentile percentage of uninsured estimate | 0.61 (0.37,0.76) | 0.61 (0.41,0.78) | 0.61 (0.37,0.76) | < 0.001 |
| Flag - the percentage of uninsured is in the 90th percentile, n (%) | 2063 (3%) | 179 (2.5%) | 1884 (3.1%) | 0.004 |
| Percentile ranking for Socioeconomic Status theme summary | 0.51 (0.31,0.67) | 0.55 (0.35,0.70) | 0.51 (0.30,0.66) | < 0.001 |
| Percentile ranking for Socioeconomic Status theme summary | 0.46 (0.27,0.72) | 0.49 (0.28,0.74) | 0.46 (0.26,0.72) | < 0.001 |
| Percentile ranking for Socioeconomic Status theme summary | 0.25 (0.12,0.40) | 0.26 (0.14,0.40) | 0.25 (0.12,0.39) | < 0.001 |
| Percentile ranking for Housing Type/ Transportation theme | 0.60 (0.34,0.78) | 0.65 (0.39,0.81) | 0.60 (0.34,0.78) | 0.1759 |
| Overall percentile ranking | 0.49 (0.30,0.69) | 0.55 (0.34,0.75) | 0.49 (0.30,0.68) | 0.2229 |
| **Smart Location Map Database, median (IQR)** | | | | |
| Walkability index | 6.8 (4.7, 9.2) | 7.5 (5, 9.7) | 6.7 (4.7, 9.2) | < 0.001 |
| Total road network density | 5.6 (2.2, 14.4) | 7.4 (2.7, 17.7) | 5.5 (2.2, 14.4) | < 0.001 |
| Total land area (acres) | 2203 (462,23681) | 1433 (310,11963) | 2203 (483,25329) | < 0.001 |
| Total geometric area (acres) of the CBG 2019 | 2242 (483,23969) | 1453 (310,12025) | 2244 (491,25868) | < 0.001 |
| Total land area (acres) that is not protected from development | 2185 (460,23380) | 1412 (293,11963) | 2203 (473,23973) | < 0.001 |
| Total water area | 13 (0,136) | 9 (0,83) | 13 (0,149) | < 0.001 |
| Number of households in CBG that own zero automobiles | 24 (10,47) | 30 (11,57) | 23 (10,46) | < 0.001 |
| Number of households in CBG that own one automobile | 140 (85,213) | 149 (93,223) | 139 (85,213) | < 0.001 |
| Number of households in CBG that own two or more automobiles | 268 (169,371) | 243 (150,335) | 270 (175,375) | < 0.001 |
| Total employment in CBSA 2017 | 78179 (9335,101504) | 78179 (9496,101504) | 78179 (9335,101504) | 0.7653 |
| Total number of workers that live in CBSA 2017 | 68894 (9951,88124) | 68894 (9991,88124) | 68894 (9951,88124) | 0.7828 |
| Housing units | 539 (405,708) | 524 (399,691) | 542 (407,711) | < 0.001 |
| Gross residential density (HU/acre) on unprotected land | 0.26 (0.024,1.26) | 0.36 (0.07,1.46) | 0.22 (0.02,1.22) | < 0.001 |
| Gross population density (people/acre) on unprotected land | 0.55 (0.05,2.52) | 0.85 (0.14,3.42) | 0.48 (0.05,2.47) | < 0.001 |
| Gross employment density (jobs/acre) on unprotected land | 0.14 (0.01,0.91) | 0.24 (0.02,1.54) | 0.13 (0.01,0.86) | < 0.001 |
| Gross entertainment (5-tier) employment density (jobs/acre) on unprotected land | 0.001 (0,0.045) | 0.004 (0,0.08) | 0.001 (0,0.04) | < 0.001 |
| Gross industrial (5-tier) employment density (jobs/acre) on unprotected land | 0.01 (0.001,0.086) | 0.03(0.003,0.19) | 0.01 (0.001,0.09) | < 0.001 |
| Gross office (5-tier) employment density (jobs/acre) on unprotected land | 0.004 (0,0.087) | 0.01 (0,0.14) | 0.003 (0,0.08) | 0.0108 |
| Gross retail (5-tier) employment density (jobs/acre) on unprotected land | 0.007 (0,0.085) | 0.02 (0,0.16) | 0.006 (0,0.08) | < 0.001 |
| Gross service (5-tier) employment density (jobs/acre) on unprotected land | 0.05 (0.003,0.33) | 0.09 (0.006,0.56) | 0.05 (0.002,0.31) | < 0.001 |
| Gross education(8-tier) employment density (jobs/acre) on unprotected land | 0 (0,0.035) | 0 (0,0.06) | 0 (0,0.03) | < 0.001 |
| Gross entertainment (8-tier) employment density (jobs/acre) on unprotected land | 0.002 (0,0.05) | 0.004 (0,0.08) | 0.001 (0,0.04) | < 0.001 |
| Gross health care (8-tier) employment density (jobs/acre) on unprotected land | 0.02 (0,0.12) | 0.03 (0,0.24) | 0.01 (0,0.11) | 0.0016 |
| Gross industrial (8-tier) employment density (jobs/acre) on unprotected land | 0.01 (0.002,0.09) | 0.03 (0.003,0.19) | 0.01 (0.002,0.09) | < 0.001 |
| Gross office (8-tier) employment density (jobs/acre) on unprotected land | 0.002 (0,0.05) | 0.01 (0,0.09) | 0.002 (0,0.049) | 0.0865 |
| Gross retail (8-tier) employment density (jobs/acre) on unprotected land | 0 (0,0.003) | 0 (0,0.01) | 0 (0,0.002) | 0.001 |
| Gross service (8-tier) employment density (jobs/acre) on unprotected land | 0.007 (0,0.07) | 0.01 (0.001,0.10) | 0.01 (0,0.06) | < 0.001 |
| Gross activity density (employment + HUs) on unprotected land | 0.46 (0.03,2.66) | 0.73 (0.09,3.57) | 0.44 (0.03,2.45) | < 0.001 |
| Employment and household entropy | 0.60 (0.46,0.76) | 0.63 (0.48,0.77) | 0.60 (0.45,0.74) | < 0.001 |
| Quantile ranked order (1-20) of [Employment and household entropy] from lowest to highest | 13(9,17) | 14 (10,18) | 13 (9,17) | < 0.001 |
| Jobs per household | 0.63 (0.28,1.52) | 0.74 (0.33,2.13) | 0.61 (0.27,1.40) | < 0.001 |
| Household Workers per Job | 1.86 (0.76,4.19) | 1.41 (0.54,3.41) | 1.91 (0.79,4.27) | < 0.001 |
| 5-tier employment entropy (denominator set to observed employment types in the CBG) | 0.74 (0.59,0.84) | 0.73 (0.59,0.84) | 0.74 (0.59,0.84) | 0.6383 |
| 5-tier employment entropy (denominator set to the static 5 employment types in the CBG) | 0.67(0.48,0.79) | 0.67 (0.49,0.79) | 0.67 (0.47,0.79) | < 0.001 |
| 8-tier employment entropy (denominator set to observed employment types in the CBG) | 0.74 (0.62,0.84) | 0.75 (0.62,0.84) | 0.74 (0.63,0.84) | 0.0263 |
| 8-tier employment entropy (denominator set to the static 8 employment types in the CBG) | 0.63 (0.47,0.75) | 0.64 (0.49,0.77) | 0.63 (0.47,0.75) | < 0.001 |
| Quantile ranked order (1-20) of [8-tier employment entropy] from lowest to highest | 13 (7,17) | 13 (8,18) | 13 (7,17) | < 0.001 |
| Trip productions and trip attractions equilibrium index | 0.48 (0.23,0.69) | 0.48 (0.40,0.67) | 0.49 (0.18,0.69) | 0.001 |
| Employment and Household entropy (based on vehicle trip production and trip attractions including all 5 employment categories) | 0.53 (0.41,0.69) | 0.54 (0.42,0.71) | 0.53 (0.40,0.69) | < 0.001 |
| Employment and Household Entropy calculations | 0.57 (0.42,0.73) | 0.57 (0.45,0.74) | 0.57 (0.42,0.73) | < 0.001 |
| Regional Diversity. Standard calculation based on population and total employment: Deviation of CBG ratio of jobs/pop from the regional average ratio of jobs/pop | 0.27 (0.07,0.58) | 0.36 (0.09,0.679) | 0.25 (0.07,0.57) | < 0.001 |
| Total road network density | 5.58 (2.23,14.43) | 7.43 (2.68,17.72) | 5.45 (2.22,14.36) | < 0.001 |
| Network density in terms of facility miles of auto-oriented links per square mile | 0.32 (0.099,0.68) | 0.32 (0.02,0.79) | 0.32 (0.11,0.68) | < 0.001 |
| Network density in terms of facility miles of multi-modal links per square mile | 1.39 (1.026,1.82) | 1.42 (1.02,2.06) | 1.39 (1.03,1.81) | < 0.001 |
| Network density in terms of facility miles of pedestrian-oriented links per square mile | 3.60 (0.41,12.64) | 4.59 (0.85,14.24) | 3.37 (0.38,12.29) | < 0.001 |
| Street intersection density | 17.26 (2.02,68.77) | 22.56 (3.50,96.07) | 17.08 (1.97,67.45) | < 0.001 |
| Intersection density in terms of auto-oriented intersections per square mile | 0.49 (0,1.30) | 0.49 (0,1.45) | 0.49 (0,1.30) | < 0.001 |
| Intersection density in terms of multi-modal intersections having three legs per square mile | 2.98 (1.42,6.87) | 3.64 (1.64,8.28) | 2.93 (1.40,6.77) | < 0.001 |
| Intersection density in terms of multi-modal intersections having four or more legs per square mile | 0.33 (0.08,1.73) | 0.59 (0.09,2.58) | 0.32 (0.08,1.64) | < 0.001 |
| Intersection density in terms of pedestrian-oriented intersections having three legs per square mile | 12.88 (0.57,49.67) | 18.36 (1.38,66.46) | 11.09 (0.54,47.02) | < 0.001 |
| Intersection density in terms of pedestrian-oriented intersections having four or more legs per square mile | 3.21 (0.09,18.26) | 4.86 (0.24,26.65) | 3.08 (0.08,17.19) | < 0.001 |
| Working age population within 45 minutes auto travel time | 5272 (2518,10069) | 5625 (2876,10832) | 5227 (2422,9952) | 0.0108 |
| Jobs within 45 minutes auto travel time | 5625 (2318,13345) | 6258 (3094,14291) | 5565 (2281,13290) | 0.0013 |
| Proportional Accessibility to Regional Destinations - Auto: Working age population accessibility expressed as a ratio of total CBSA accessibility | 0.01 (0.001,0.016) | 0.01 (0.003,0.018) | 0.01 (0.001,0.016) | < 0.001 |
| Regional Centrality Index – Auto: CBG [D5ce] score relative to max CBSA [D5ce] score | 0.44 (0.13,0.80) | 0.54 (0.20,0.86) | 0.43 (0.11,0.80) | < 0.001 |
| Proportional Accessibility to Regional Destinations - Auto: Employment accessibility expressed as a ratio of total CBSA accessibility | 0.01 (0.001,0.017) | 0.01 (0.002,0.02) | 0.01 (0.001,0.017) | < 0.001 |
| Regional Centrality Index – Auto: CBG [D5cr] score relative to max CBSA [D5cr] score | 0.34 (0.08,0.74) | 0.43 (0.13,0.83) | 0.33 (0.05,0.72) | < 0.001 |
| Entertainment jobs within a 5-tier employment classification scheme | 9 (0,59) | 12 (0,90) | 9 (0,57) | < 0.001 |
| Industrial jobs within a 5-tier employment classification scheme | 50 (15,122) | 56 (15,122) | 50 (15,122) | 0.0101 |
| Office jobs within a 5-tier employment classification scheme | 14 (2,65) | 21 (3,81) | 14 (2,64) | < 0.001 |
| Retail jobs within a 5-tier employment classification scheme | 20 (2,81) | 29 (5,99) | 19 (2,78) | < 0.001 |
| Service jobs within a 5-tier employment classification scheme | 100 (33,237) | 118 (40,287) | 99 (32,232) | < 0.001 |
| Education jobs within an 8-tier employment classification scheme | 0 (0,65) | 0 (0,73) | 0 (0,63) | < 0.001 |
| Entertainment jobs within an 8-tier employment classification scheme | 9 (0,59) | 12 (0,90) | 9 (0,57) | < 0.001 |
| Health care jobs within an 8-tier employment classification scheme | 31 (4,97) | 45 (5,132) | 27 (4,93) | < 0.001 |
| Industrial jobs within an 8-tier employment classification scheme | 50 (15,122) | 56 (15,122) | 50 (15,122) | 0.0107 |
| Office jobs within an 8-tier employment classification scheme | 9 (1,39) | 13 (2,48) | 8 (1,38) | < 0.001 |
| Public administration jobs within an 8-tier employment classification scheme | 0 (0,11) | 0 (0,14) | 0 (0,10) | 0.7254 |
| Retail jobs within an 8-tier employment classification scheme | 20 (2,81) | 29 (5,99) | 19 (2,78) | 0.0537 |
| Service jobs within an 8-tier employment classification scheme | 19 (5,56) | 22 (6,73) | 19 (5,56) | < 0.001 |
| # of workers earning $3333/month or more (work location) | 74 (29,192) | 81 (34,275) | 72(29,187) | < 0.001 |
| # of workers earning $1250/month or less (work location) | 82 (31,194) | 101 (40,256) | 79 (29,187) | < 0.001 |
| # of workers earning more than $1250/month but less than $3333/month (work location) | 108 (43,283) | 124 (52,387) | 105 (42,279) | < 0.001 |
| % LowWageWk of total #workers in a CBG (work location) | 0.30 (0.23,0.38) | 0.31 (0.23,0.38) | 0.29 (0.23,0.38) | 0.6442 |
| Households (occupied housing units) | 440 (336,607) | 430 (323,600) | 444 (337,609) | < 0.001 |
| Percent of zero-car households in CBG | 0.05 (0.02,0.10) | 7.5 (5,9.7) | 6.7 (4.7,9.2) | < 0.001 |
| Percent of one-car households in CBG | 0.32 (0.21,0.43) | 0.06 (0.023,0.13) | 0.05 (0.02,0.10) | < 0.001 |
| Percent of two-plus-car households in CBG | 0.61 (0.49,0.75) | 0.36 (0.25,0.46) | 0.31 (0.21,0.42) | < 0.001 |
| Percent of population that is working aged 18 to 64 years | 0.579 (0.532,0.626) | 0.56 (0.42,0.71) | 0.62 (0.49,0.75) | < 0.001 |
| Percent of low wage workers in a CBG (home location) | 0.27 (0.24,0.30) | 0.58 (0.53,0.63) | 0.58 (0.53,0.63) | 0.2423 |
| Count of workers in CBG (home location) | 495 (365,675) | 0.27 (0.25,0.31) | 0.27 (0.24,0.30) | < 0.001 |

a Hispanic or Latino (of any race); Black and African American, Not Hispanic or Latino; American Indian and Alaska Native, Not Hispanic or Latino; Asian, Not Hispanic or Latino; Native Hawaiian and Other Pacific Islander, Not Hispanic or Latino; Two or More Races, Not Hispanic or Latino; Other Races, Not Hispanic or Latino) estimate
