# Supplementary material for: Enriching Electronic Health Records with Social Determinants of Health Data from Consumer Database: A Comparative Fit-for-Use Study
Source: Research Square preprint supplement (doi:10.21203/rs.3.rs-5349886/v1), 2025-03-21
Supplement: Supplementary file 3 [file 8c3a1fe03fab3c5c23147a80.docx]

**SUPPLEMENTAL APPENDIX D – Concordance Analysis (Smoking, Diabetes)**

| **Table D.1. Cross-tabulation of SMOKING (HR) by H_BUY_CIGARS (I-SDH) and H_SMOKING (I-SDH)** | | | | | |
| --- | --- | --- | --- | --- | --- |
| **SMOKING (EHR)** | **H_BUY_CIGARS (I-SDH)** | | **H_SMOKING (I-SDH)** | |  |
| **NULL** | **1** | **NULL** | **1** | **Total** |
| **NULL** | 169935 | 11620 | 163931 | 17624 | 181555 |
| 93.6 | 6.4 | 90.29 | 9.71 | *Row%* |
| 27.86 | 25.56 | 27.87 | 26.26 | *Col%* |
| **Current every day smoker** | 65593 | 6697 | 61546 | 10744 | 72290 |
| 90.74 | 9.26 | 85.14 | 14.86 | *Row%* |
| 10.76 | 14.73 | 10.46 | 16.01 | *Col%* |
| **Current some day smoker** | 8360 | 800 | 8073 | 1087 | 9160 |
| 91.27 | 8.73 | 88.13 | 11.87 | *Row%* |
| 1.37 | 1.76 | 1.37 | 1.62 | *Col%* |
| **Former smoker quit longer than 12 months** | 60228 | 5730 | 57678 | 8280 | 65958 |
| 91.31 | 8.69 | 87.45 | 12.55 | *Row%* |
| 9.88 | 12.6 | 9.81 | 12.34 | *Col%* |
| **Former smoker quit within 12 months** | 14714 | 1402 | 13997 | 2119 | 16116 |
| 91.3 | 8.7 | 86.85 | 13.15 | *Row%* |
| 2.41 | 3.08 | 2.38 | 3.16 | *Col%* |
| **Heavy tobacco smoker** | 1042 | 105 | 976 | 171 | 1147 |
| 90.85 | 9.15 | 85.09 | 14.91 | *Row%* |
| 0.17 | 0.23 | 0.17 | 0.25 | *Col%* |
| **Light tobacco smoker** | 4335 | 473 | 4221 | 587 | 4808 |
| 90.16 | 9.84 | 87.79 | 12.21 | *Row%* |
| 0.71 | 1.04 | 0.72 | 0.87 | *Col%* |
| **Never smoker** | 284904 | 18574 | 277069 | 26409 | 303478 |
| 93.88 | 6.12 | 91.3 | 8.7 | *Row%* |
| 46.72 | 40.86 | 47.1 | 39.34 | *Col%* |
| **Smoker, current status unknown** | 755 | 62 | 716 | 101 | 817 |
| 92.41 | 7.59 | 87.64 | 12.36 | *Row%* |
| 0.12 | 0.14 | 0.12 | 0.15 | *Col%* |
| **Total** | 609866 | 45463 | 588207 | 67122 | 655329 |

| **Table D.2. Cross-tabulation of H_DIABETIC (HR) by H_BUY_CIGARS (I-SDH) and H_DIABETIC (I-SDH)** | | | | | |
| --- | --- | --- | --- | --- | --- |
| **Diagnosis of Diabetes Mellitus (EHR)** | **H_DIETING** | | **H_DIABETIC** | |  |
| **NULL** | **1** | **NULL** | **1** | **Total** |
| **No** | 365673 | 205764 | 519230 | 52207 | 571437 |
| 63.99 | 36.01 | 90.86 | 9.14 | *Row%* |
| 89.37 | 83.59 | 88.1 | 79.14 | *Col%* |
| **Yes** | 43491 | 40401 | 70133 | 13759 | 83892 |
| 51.84 | 48.16 | 83.6 | 16.4 | *Row%* |
| 10.63 | 16.41 | 11.9 | 20.86 | *Col%* |
| **Total** | 409164 | 246165 | 589363 | 65966 | 655329 |
