# Supplementary material for: Enriching Electronic Health Records with Social Determinants of Health Data from Consumer Database: A Comparative Fit-for-Use Study
Source: Research Square preprint supplement (doi:10.21203/rs.3.rs-5349886/v1), 2025-03-21
Supplement: Supplementary file 4 [file 9c593493a3c2081eb8c680cb.docx]

## SUPPLEMENTAL APPENDIX A – I-SDH Variable List

We classified the I-SDH variables into the domains and subdomains of SDOH defined by HP2030 and presented in 5 separate tables. The HP2030 domains are: (1) economic stability (ES), (2) education (ED), (3) health and health care (HC), (4) neighborhood and built environment (NE), and (5) social and community context (SC).

## Economic Stability

| **VAR** | **DESCRIPTION** |
| --- | --- |
| **Vehicle** | |
| H_VEHICLE_COUNT | Indicates the total number of vehicles owned in the household. |
| **Interests** |  |
| H_WINE | Someone in the household has an interest in wines. |
| **Occupation** | |
| H_BUSINESS_OWNER | Indicates the type of business owned by someone in the household. |
| **Income** | |
| H_INCOME | Indicates the estimated household income in narrow ranges.  This income uses 9671 Income as it's foundation. 7671 Income 100% fills in the missing data in 9671 Income Plus with the mode of the ZIP9, up to 100% coverage.  Description of 9671 Income Plus: 9671 Income Plus uses 8671 Income as it's foundation. 9671 Income Plus fills in the missing data in 8671 Income with inferred income, up to the household level match rate, generally 88%-93%, but it depends on the client file. Description of 8671 Income: 8671 Income is about 3-5% consumer self-reported via indicating their income on product registrations and website memberships, and about 95-98% modeled from the sources, based on a variety of demographic factors, including age, occupation, home ownership, and median income for the local area. Vendor blends all of the source income data (the self-reported and the modeled data from the sources) into the Vendor household level income elements using several rules including recency, commonality, and hierarchy.  This income element has different ranges/values than the other income elements. |
| H_INCOME_PREC | Indicates the precision of the data appended: Household, Household Inferred, ZIP+4 or ZIP |
| **Financial** | |
| H_TOTAL_SPEND_2YR | Total spending for the past 2 years on either online of offline purchases |
| H_ONLINE_SPEND | Total spending on online purchases |
| H_NUM_CREDIT_LINE | Indicates credit purchases made in multiple retail stores for the household. |
| H_PURCHACE_CAT | Indicates the most frequent retail purchase category within the past two years. |
| H_BANK_CARD | Indicates possession of VISA or Mastercard bankcard(s) in a household. |
| H_PREMIUM_CARD | Indicates possession of premium credit card(s) in a household. Premium credit cards would be Gold or Platinum level. |
| **Household** | |
| H_OWN_RENT | Indicates whether a household is owner or renter occupied. This element includes 1) 8606 Home Owner/Renter, 2) an inference rule that fills in missing data by inferring renter coverage up to the household level match rate of the file being appended, and 3) a mode calculation of the ZIP+4 and ZIP.  1) For the 8606 Home Owner/Renter portion, it is fed by property data, self-reported data and address data which indicates the home is owned by the household or rented by the household, i.e., home purchase date, loan information, some indications in the address field that would indicate the property is a rental.  2) For the inference rule inferred portion, since the home ownership coverage in 8606 Home Owner/Renter is above the census percentage of home owners in the U.S., the rule only infers renters.  3) For the mode portion, the most frequently occurring value of O or R for the ZIP+4 or ZIP is used. Our nationally represented consumer file is used to do the mode calculation. This element includes an indicator of the level of data appended. |
| H_RENT_PREC | Indicates the precision of the data appended: Household, Household Inferred, ZIP+4 or ZIP |
| H_HOME_LENGTH | Indicates the years a household has lived at their address. This element includes 1) 8607 Home Length of Residence, 2) a model/inference that fills in missing data by inferring length of residence coverage up to the household level match rate of the file being appended, and 3) a mode calculation of the ZIP+4 and ZIP.  1) For the 8607 Length of Residence portion, it is fed by Purchase Date of Home, Move Date, other information where a person has indicated their household's length of residence, or the source has inferred a length of residence from a first-seen date, the date a landline phone was connected, etc.  2) For the modeled/inferred portion, a question on a syndicated survey file is used to target the inferred data. 3) For the mode portion, the most frequently occurring length of residence value of 00-15+ for the ZIP+4 or ZIP is used. Our nationally represented consumer file is used to do the mode calculation. This element includes an indicator of the level of data appended. |
| H_HOME_PREC | Indicates the precision of the data appended: Household, Household Inferred, ZIP+4 or ZIP |
| **Property** | |
| H_ADDRESS_LENGTH | Indicates the total time a household has lived at their current address in ranges. |
| H_HOME_LOAN_AMT | Indicates the total home loan amount for the household in ranges. There may be multiple loans on the home. |
| H_HOME_SQFT | Indicates the size of the home in ranged square footage. |
| H_HOME_EQUITY | Indicates the amount of equity available in the home. |
| H_ASSESSED_VALUE | Indicates the assessed value of the home. An assessed value is the dollar value assigned to a property for purposes of measuring applicable taxes. Assessed valuation is used to determine the value of a residence for tax purposes and takes home market value into consideration. County assessments are done periodically, i.e., every 5 years, unless in the cases of an improvement to the property, such as building a home on the property, a home remodel, etc. which would cause a new assessment at that time. This assessed value comes straight from the county offices, not manipulated by the source or the vendor. |
| H_OWNER_TYPE | Indicates the type of home owner. |

**Education**

| **VAR** | **DESCRIPTION** |
| --- | --- |
| **Education** |  |
| P_EDUCATION | Indicates the highest known education of the person. Includes 'Some College' and 'Some High School'. |

**Health and Healthcare**

| **VAR** | **DESCRIPTION** |
| --- | --- |
| **Interests** | |
| H_CHOLESTEROL | This household has a cholesterol interest because they have purchased cholesterol focused products or indicated someone in the household has a cholesterol focus. The element does not fall under HIPAA regulations. The data is based on self-reported data and over-the-counter purchases, NOT from drug prescriptions or medical records. The data can be used for marketing and segmentation purposes. |
| H_DIABETIC | This household has a diabetic interest because they have purchased diabetic products, subscribe to an online diabetic newsletter, have registered to receive diabetic offers, or they indicated that someone in the household has diabetes. The element does not fall under HIPAA regulations. The data is based on self-reported data and over-the-counter purchases, NOT from drug prescriptions or medical records. The data can be used for marketing and segmentation purposes. These promotional responders all subscribe to an online health newsletter focusing on Diabetic News and Health Tips or have registered to receive multiple health and other diabetic offer. |
| H_HOMEOPATH | This household has a homeopathic interest because they have purchased homeopathic products or indicated someone in the household has homeopathic interests. The element does not fall under HIPAA regulations. The data is based on self-reported data and over-the-counter purchases, NOT from drug prescriptions or medical records. The data can be used for marketing and segmentation purposes. |
| H_ORGANIC | This household has an Organic interest because they have purchased organic products or indicated someone in the household has an organic interest. The element does not fall under HIPAA regulations. The data is based on self-reported data and over-the-counter purchases, NOT from drug prescriptions or medical records. The data can be used for marketing and segmentation purposes. |
| H_LOW_FAT | Someone in the household has an interest in low fat cooking. |
| H_VEGETARIAN | Someone in the household has an interest in vegetarian food. |
| H_NATURAL_FOOD | Someone in the household has an interest in natural or organic foods. |
| H_DIETING | Someone in the household has an interest in dieting / weight loss. |
| H_HEALTH_CAUSE | Indicates that the household financially supports health-related causes. |
| **Household** | |
| H_LIFE_INSURE | Indicates that someone in the household owns a life insurance policy. |
| **Lifestyle** | |
| H_BUY_CIGARS | A Gift purchase of Cigars has occurred within the last 24 months in the Household. The Buying Activity data has been summarized into a categorical level according to purchase activity. This removes certain point-of-sale information, such as SKUs (stock keeping unit) but allows visibility into types of purchases and buying behaviors within the Household. |
| H_FITNESS_WARRIOR | Households with people who like to exercise and have middle income or above |
| H_HEALTH_ENTHUS | Households with people who are interested in their health and medical well being |
| H_CALORIE_COOKS | Households with people who use low fat cooking methods or use natural foods such as organic meats and vegetables |
| H_SMART_HOME | Households with people who are high tech and use wireless devices such as wireless home security systems, lighting and cooling |
| H_FITNESS_TRACK | Households with people who wear fitness sensors like fitbit, jawbone, yadda. |
| **Financial** | |
| H_BUY_MO_HEALTH | Indicates a mail order purchase made by the household of health-related items. |

**Neighborhood and Built Environment**

| **VAR** | **DESCRIPTION** |
| --- | --- |
| **Interests** | |
| H_GREEN_LIVE | Green Living represents households that are living environmentally friendly. They use environmentally healthy products and services such as, eco-friendly soaps, detergents, and household cleaning products. These households eat organic foods, and potentially grow the food themselves. They may also be socially active by donating funds to environmental causes. Some of them drive vehicles that are considered "green" or hybrids. |
| H_CAT_OWNER | Someone in the household has an interest in owning a cat or actually owns a cat. |
| H_DOG_OWNER | Someone in the household has an interest in owning a dog or actually owns a dog. |
| H_HOME_IMPROVE | Grouping means that weve taken all the "Home Improvement" interest related elements and put them into one element. If any one of the following elements are flagged for a record, then the Home Improvement Grouping element will be flagged as well: 7815 Home Furnishings / Decorating 7816 Home Improvement 7851 Home Improvement - Do-It-Yourselfers 8272 DIY Living |
| **Property** | |
| H_HOME_EXTERIOR | Indicates the type of exterior of the residence. |
| H_HOME_ROOF_TYPE | Indicates the type of roof of the residence. |
| H_HOME_TYPE | Indicates the specific kind of home. |
| H_HOME_BUILD_YR | Indicates the year that home was constructed. |

**Social and Community Context**

| **VAR** | **DESCRIPTION** |
| --- | --- |
| **Household** | |
| H_SINGLE_PARENT | Indicates that a single parent exists in the household. |
| H_MARRITAL_STAT | Indicates whether anyone in the household is married. This element includes 1) 9609 Marital Status in the Household, 2) business rule inferences that create Inferred Married and Inferred Single, 3) inferred/modeled data that fills in missing data by inferring marital status coverage up to the household level match rate of the file being appended, and 4) a mode calculation of the ZIP+4 and ZIP. 1) For the 8609 Marital Status portion, it is fed by consumer self-reported marital data. 2) Inferred Married and Inferred Single, values A and B, are inferred based on business rules.Inferred Married - When the marital status of Married or Single cannot be determined from a source and there are 2 names in the household with gender of Male and Female, within a certain age range of each other, then marital status is set to A "Inferred Married". Inferred Single - When the marital status of Married or Single cannot be determined from a source and there is only one name in the household, then the marital status is set to B "Inferred Single". 3) Inferred/Modeled data is used to fill in married and single values up to the household match rate. 4) Mode calculations of married and single at the ZIP+4 and ZIP levels are used to fill in married and single values to increase coverage up to 100%. |
| H_MARRITAL_PREC | Indicates the precision of the data appended: Household, Household Inferred, ZIP+4 or ZIP |
| H_NUM_PEOPLE | Indicates the number of known people in the household, both adults and children. This element includes 1) 8629 Household Size, 2) an inference rule that fills in missing data by inferring household size coverage up to the household level match rate of the file being appended, and 3) a mode calculation of the ZIP+4 and ZIP.  1) For the 8629 Household Size portion, it is a sum of Number of Adults and Number of Children.  2) For the inference rule, since the household size coverage percentage for 2 people in the household is lower than census, the rule only infers the value of 2 people in the household. 3) For the mode portion, the most frequently occurring household size value of 1-9+ for the ZIP+4 or ZIP is used. Our nationally represented consumer file is used to do the mode calculation. This element includes an indicator of the level of data appended. (Note: There is a small percentage of Household Size (0.005%) that will not sum to Number of Adults + Number of Children.) |
| H_PEOPLE_PREC | Indicates the precision of the data appended: Household, Household Inferred, ZIP+4 or ZIP |
| H_NUM_CHILD | Indicates the known number of children in the household. Includes modeled/inferred data added to the value of '0 Number of Children' and includes the mode of the ZIP9 and ZIP to extend the coverage to 100%. This element includes 2 fields, 7602_01 which indicates the number of children, and 7602_02 which is the precision indicating the level of data that was appended. This 7602 Number of Children includes a calculated mode of Number of Children from the ZIP9 and ZIP which brings the coverage up to 100%. The basis of this element is 9602 Number of Children PLUS. Calculating the mode of the ZIP9 and ZIP can add data to all Number of Children values. NOTE: For the HOUSEHOLD LEVEL children's data: The children's names are not provided by the sources. The logic gathers the children's ages from across all the sources into a table to net the data to only the children's ages that exist in a household. Proprietary logic calculates the netting. The resulting ages are then populated into the children's age elements, then counted to populate the number of children element and the presence of children element. Sources that provide an actual Number of Children also contribute. NOTE: Household level Children's age less than age 16 and gender data in the state of California will have reduced coverage due to the California Consumer Privacy Act (CCPA) regulations. |
| H_CHILD_PREC | Indicates the precision of the data appended: Household, Household Inferred, ZIP+4 or ZIP |
| H_TRUCK_OWNER | Someone in the household has indicated that they own a truck. This does not include SUVs. |
| H_MCYCLE_OWNER | Someone in the household has indicated that they own a motorcycle. |
| H_RV_OWNER | Someone in the household has indicated that they own a recreational vehicle (RV). |
| **Ethnicity** | |
| P_ETHNIC_GRP | Likely Race/Ethnicity of the person, based on self-reported sources, public sources, and surname/Ethnicity tables. |
| P_COUNTRY_ORIGIN | Likely Country of Origin of the person, based on a surname/heritage of surname table. |
| P_HISPANIC_LANG | Likely Hispanic language preference (does or does not speak Spanish) of the person. This data is fully modeled. |
| P_RACE | Indicates the race of the person. |
| **Lifestyle** | |
| H_SMOKING | Someone in the household has an interest in smoking / tobacco. |
| **Interests** | |
| H_RELIGION | Someone in the household has an interest in religion / inspirational. |
| H_READING | Someone in the household has a general interest in reading. |
| H_RUN_JOG | Someone in the household has an interest in running/jogging for exercise. |
| H_WALKING | Someone in the household has an interest in walking for exercise. |
| H_AUTO_WORK | Someone in the household has an interest in working on vehicles and mechanics. |
| H_WOODWORKING | Someone in the household has an interest in woodworking. |
| H_SELF_IMPROVE | Someone in the household has an interest in self improvement. |
| H_FISHING | Someone in the household has an interest in fishing. |
| H_CAMPING | Someone in the household has an interest in camping / hiking. |
| H_HUNTING | Someone in the household has an interest in hunting / shooting. |
| H_BOATING | Someone in the household has an interest in boating / sailing. |
| H_BIKING | Someone in the household has an interest in biking / mountain biking. |
| H_SNOW_SKI | Someone in the household has an interest in snow skiing. |
| H_MOTORCYCLE | Someone in the household has an interest in riding motorcycles. |
| H_SPORTS | Grouping means that weve taken all the "Sports" interest related elements and put them into one element. If any one of the following elements are flagged for a record, then the Sports Grouping element will be flagged as well: 7781 Spectator Sports - Auto / Motorcycle Racing 7782 Spectator Sports - Football 7783 Spectator Sports - Baseball 7784 Spectator Sports - Basketball 7785 Spectator Sports - Hockey 7786 Spectator Sports - Soccer 7787 Spectator Sports - Tennis 7810 Tennis 7811 Golf 7813 Motorcycling 7847 NASCAR 8274 Exercise - Sporty Living 8315 Power Boating |
| H_OUTDOORS | Grouping means that weve taken all the "Outdoor" interest related elements and put them into one element. If any one of the following elements are flagged for a record, then the Outdoors Grouping element will be flagged as well: 7802 Fishing 7803 Camping / Hiking 7804 Hunting / Shooting 7805 Boating / Sailing 7806 Water Sports 7807 Scuba Diving 7808 Biking / Mountain Biking 7812 Snow Skiing 7814 Equestrian |
| H_EXERCISE | Grouping means that weve taken all the "Exercise / Health" interest related elements and put them into one element. If any one of the following elements are flagged for a record, then the Exercise/Health Grouping element will be flagged as well: 7750 Exercise - Running / Jogging 7751 Exercise - Walking 7752 Exercise - Aerobic 7770 Health / Medical 7808 Biking / Mountain Biking 8274 Sporty Living 7771 Dieting / Weight Loss |
| H_CAREER | These are Career Minded people who focus on career and look for opportunities to move higher in their company with a goal to have executive status. |
| H_CHARITY | Indicates that the household financially supports charitable causes. |
| H_ANIMAL_WELL | Indicates that the household financially supports animal welfare causes. |
| H_ARTS_CULTURE | Indicates that the household financially supports arts or cultural causes. |
| H_CHILD_CAUSES | Indicates that the household financially supports children's causes. |
| H_ENVIRONMENT | Indicates that the household financially supports environment or wildlife causes. |
| H_INTERNAT_AID | Indicates that the household financially supports international aid-related causes. |
| H_RELIGION_CAUSE | Indicates that the household financially supports religious causes. |
| H_VETERAN_AID | Indicates that the household financially supports veteran-related causes. |
| H_OTHER_CAUSES | Indicates that the household financially supports other community causes. |
| **Political** | |
| P_POLITIC_PARTY | Indicates the political party associated with the person for voting purposes. |
| H_POLITICS_CAUSE | Indicates that the household financially supports political causes. |
| H_RIGHT_CAUSES | Indicates that the household financially supports conservative political causes. |
| H_LEFT_CAUSES | Indicates that the household financially supports liberal political causes. |
| **Property** | |
| H_DWELLING_TYPE | Indicates if more than one family lives at a particular address. Single-family dwelling units are defined as residential buildings housing one family or household, such as a house. The building does not share an inside wall with any other house or dwelling. It does not touch any other dwelling. Multi-family dwelling units are defined as residential buildings housing more than one household. i.e., Multiple separate housing units for residential inhabitants are contained within one building or several buildings within one complex, such as an apartment building. Condos are coded as multi-family dwelling units. |
| **Occupation** | |
| H_WOMAN_WORKING | Indicates that a working woman is present in the household. There is a female in household with an occupation status not equal to Homemaker or retired. The absence of a positive indicator in this field does NOT indicate there is not a working woman in the household, only that the information was not available. |
| P_OCCUPATION | Indicates the occupation of the input individual's name appearing on the customer's file. |
| H_VETERAN | Indicates that a veteran exists in the household. |
| **Other** | |
| P_DMA_OPT_OUT | Opt out of the direct mail adversising |
| P_EMAIL_AVAIL | Indicates the person has an email address available. |
