# Supplementary material for: Enriching Electronic Health Records with Social Determinants of Health Data from Consumer Database: A Comparative Fit-for-Use Study
Source: Research Square preprint supplement (doi:10.21203/rs.3.rs-5349886/v1), 2025-03-21
Supplement: Supplementary file 5 [file cdb7d8255b83307d90eddb9f.docx]

## SUPPLEMENTAL APPENDIX B – S-SDH Variable List

The S-SDH variables are presented in separated tables according to data provenance (source), which are also mapped to the 5 domains SDOH defined by HP2030: (1) economic stability (ES), (2) education (ED), (3) health and health care (HC), (4) neighborhood and built environment (NE), and (5) social and community context (SC).

**Medically Underserved Area (MUA) – Health and Healthcare (HC)**

| **Variable** | **Description** |
| --- | --- |
| MUA | Index score of medically underserved areas, the lower the score is the less access |

**Rural-Urban Commuting Area (RUCA) – Social and Community Context (SC)**

| **Variable** | **Description** |
| --- | --- |
| RUCA_PRIMARY | Primary RUCA codes, 1 - 10 |
| RUCA_SECONARY | Secondary RUCA codes sub-categories for each RUCA_PRIMARY code |

**Area Deprivation Index (ADI) – Neighbourhood and Built Environment (NE)**

| **Variable** | **Description** |
| --- | --- |
| ADI_NATRANK | ADI National Ranking Percentile (1 – 100) |
| ADI_STATERANK | ADI State Ranking Percentile (1 – 10) |

**American Community Survey (ACS) – Neighbourhood and Built Environment (NE)**

| **Variable** | **Description** |
| --- | --- |
| ACS1 | Bird Index [Scale Score] for Community Stress in community where patient resides from DoC ACS data? |
| ACS2 | [Number fraction] of households in community where patient resides receiving public assistance income or FOOD STAMPS/SNAP in past 12 months from DoC ACS data? |
| ACS3 | [Number Fraction] of workers over 16 years whose means of transportation is public transportation excluding taxicab in community where patient resides from DoC ACS data? |
| ACS4 | [Number Fraction] of workers over 16 years whose means of transportation is motorcycle in community where patient resides from DoC ACS data? |
| ACS5 | [Number Fraction] of workers over 16 years whose means of transportation is bicycle in community where patient resides from DoC ACS data? |
| ACS6 | [Number Fraction] of workers over 16 years whose means of transportation is walking in community where patient resides from DoC ACS data? |
| ACS7 | [Number Fraction] of workers over 16 years who work in agriculture, forestry,fishing, hunting or mining in community where patient resides from DoC ACS data? |
| ACS8 | [Number Fraction] of workers over 16 years who work in construction in community where patient resides from DoC ACS data? |
| ACS9 | [Number Fraction] of workers over 16 years who work in manufacturing in community where patient resides from DoC ACS data? |
| ACS10 | [Number Fraction] of workers over 16 years who work in wholesale trade in community where patient resides from DoC ACS data? |
| ACS11 | [Number Fraction] of workers over 16 years who work retail trade in community where patient resides from DoC ACS data? |
| ACS12 | [Number Fraction] of workers over 16 years who work in transportation, warehousing or utilities in community where patient resides from DoC ACS data? |
| ACS13 | [Number fraction] of workers 16 years and older in community where patient resides whose income is below 100 % of poverty level from DoC ACS data? |
| ACS14 | [Number Fraction] of workers over 16 years who work in information in community where patient resides from DoC ACS data? |
| ACS15 | [Number Fraction] of workers over 16 years who work in real estate, rental or leasing in community where patient resides from DoC ACS data? |
| ACS16 | [Number Fraction] of workers over 16 years who work in professional scientific, management, administrative or waste management in community where patient resides from DoC ACS data? |
| ACS17 | [Number Fraction] of workers over 16 years who work in educational services, health care or social assistance in community where patient resides from DoC ACS data? |
| ACS18 | [Number Fraction] of workers over 16 years who work in arts, entertainment, recreation, accomodation or food servicesin community where patient resides from DoC ACS data? |
| ACS19 | [Number Fraction] of workers over 16 years who work in other services excluding public administration in community where patient resides from DoC ACS data? |
| ACS20 | [Number Fraction] of workers over 16 years who work in public administration in community where patient resides from DoC ACS data? |
| ACS21 | [Number Fraction] of workers over 16 years who work in armed forces in community where patient resides from DoC ACS data? |
| ACS22 | [Number Fraction] of workers 18 to 64 years who are employed in the labor force in community where patient resides from DoC ACS data? |
| ACS23 | [Number Fraction] of residents who are male in community where patient resides from DoC ACS data? |
| ACS24 | [Number fraction] of workers 16 years and older in community where patient resides whose income is between 100 % and 150% of poverty level from DoC ACS data? |
| ACS25 | [Number Fraction] of residents who are female in community where patient resides from DoC ACS data? |
| ACS26 | [Number Fraction] of residents who report having two or more racial origins in community where patient resides from DoC ACS data? |
| ACS27 | [Number Fraction] of residents who report being white alone and not Hispanic or Latino in community where patient resides from DoC ACS data? |
| ACS28 | [Number Fraction] of residents who report being Hispanic or Latino in community where patient resides from DoC ACS data? |
| ACS29 | [Number Fraction] of residents who report being black or african american alone in community where patient resides from DoC ACS data? |
| ACS30 | [Number Fraction] of residents who report being american indian or alaska native alone in community where patient resides from DoC ACS data? |
| ACS31 | [Number Fraction] of residents who report being asian alone in community where patient resides from DoC ACS data? |
| ACS32 | [Number Fraction] of residents who report being native Hawaiian or Pacific Islander alone in community where patient resides from DoC ACS data? |
| ACS33 | [Number Fraction] of residents who report being solely some other race in community where patient resides from DoC ACS data? |
| ACS34 | [Number Fraction] of residents who are under 18 years of age in community where patient resides from DoC ACS data? |
| ACS35 | [Number fraction] of workers 16 years and older in community where patient resides whose income is greater than or equal to 150% of poverty level from DoC ACS data? |
| ACS36 | [Number Fraction] of residents who are 18 to 24 years of age in community where patient resides from DoC ACS data? |
| ACS37 | [Number Fraction] of residents who are 25 to 64 years of age in community where patient resides from DoC ACS data? |
| ACS38 | [Number Fraction] of residents who are 65 to 79 years of age in community where patient resides from DoC ACS data? |
| ACS39 | [Number Fraction] of residents who are 80 years of age or older in community where patient resides from DoC ACS data? |
| ACS40 | [Number Fraction] of residents 25 years and older who completed 5th grade or less schooling in community where patient resides from DoC ACS data? |
| ACS41 | [Number Fraction] of residents 25 years and older who completed 5th grade but did not complete high school or GED in community where patient resides from DoC ACS data? |
| ACS42 | [Number Fraction] of residents 25 years and older who completed high school or GED in community where patient resides from DoC ACS data? |
| ACS43 | [Number Fraction] of residents 25 years and older who completed some college but did not get a degree in community where patient resides from DoC ACS data? |
| ACS44 | [Number Fraction] of residents 25 years and older who completed and associates or higher college degree in community where patient resides from DoC ACS data? |
| ACS45 | [Number fraction] of households with one or more types of computing devices in community where patient resides from DoC ACS data? |
| ACS46 | [Number fraction] of workers 16 years and older in community where patient resides who are in labor force from DoC ACS data? |
| ACS47 | [Number fraction] of households with no computer in community where patient resides from DoC ACS data? |
| ACS48 | [Number fraction] of households with broadband internet in community where patient resides from DoC ACS data? |
| ACS49 | [Number fraction] of households without allocation of telephone service available in community where patient resides from DoC ACS data? |
| ACS50 | [Number fraction] of households with housing units built prior to 1970 in community where patient resides from DoC ACS data? |
| ACS51 | [Number fraction] of households without kitchen facilities in community where patient resides from DoC ACS data? |
| ACS52 | [Number fraction] of households without complete plumbing facilities in community where patient resides from DoC ACS data? |
| ACS53 | Patient resides [Ordinal] more than 1/2 mile from grocery store if urban or more than 10 miles if rural from DoC ACS data? |
| ACS54 | [Number fraction] of renter-occupied housing units in community where patient resides with gross rent >= 30% of household income in past 12 months from DoC ACS data? |
| ACS55 | Average Number [Number concentration] of persons occupying a single household in community where patient resides from DoC ACS data? |
| ACS56 | Travel [Time] to work of workers over 16 years who do not work at home in the community where patient resides from DoC ACS data? |
| ACS57 | [Number Fraction] of workers over 16 years whose means of transportation is car, truck or van in community where patient resides from DoC ACS data? |

**Food Access Research Atlas (FARA) – Social and Community Context (SC)**

| **Variable** | **Description** |
| --- | --- |
| GROUPQUARTERSFLAG | Flag for tract where >=67% live in group quarters |
| HUNVFLAG | Flag for tract where >= 100 of households do not have a vehicle, and beyond 1/2 mile from supermarket |
| LA1AND10 | Flag for low access tract at 1 mile for urban areas or 10 miles for rural areas |
| LA1AND20 | Flag for low access tract at 1 mile for urban areas or 20 miles for rural areas |
| LAAIAN10SHARE | Share of tract population that are American Indian or Alaska Native beyond 10 miles from supermarket |
| LAAIAN1SHARE | Share of tract population that are American Indian or Alaska Native beyond 1 mile from supermarket |
| LAAIAN20SHARE | Share of tract population that are American Indian or Alaska Native beyond 20 miles from supermarket |
| LAASIAN10SHARE | Share of tract population that are Asian beyond 10 miles from supermarket |
| LAASIAN1SHARE | Share of tract population that are Asian beyond 1 mile from supermarket |
| LAASIAN20SHARE | Share of tract population that are Asian beyond 20 miles from supermarket |
| LAASIANHALFSHARE | Share of tract population that are Asian beyond 1/2 mile from supermarket |
| LABLACK10SHARE | Share of tract population that are Black or African American beyond 10 miles from supermarket |
| LABLACK1SHARE | Share of tract population that are Black or African American beyond 1 mile from supermarket |
| LABLACK20SHARE | Share of tract population that are Black or African American beyond 20 miles from supermarket |
| LABLACKHALFSHARE | Share of tract population that are Black or African American beyond 1/2 mile from supermarket |
| LAHALFAND10 | Flag for low access tract at 1/2 mile for urban areas or 10 miles for rural areas |
| LAHISP10SHARE | Share of tract population that are of Hispanic or Latino ethnicity beyond 10 miles from supermarket |
| LAHISP1SHARE | Share of tract population that are of Hispanic or Latino ethnicity beyond 1 mile from supermarket |
| LAHISP20SHARE | Share of tract population that are of Hispanic or Latino ethnicity beyond 20 miles from supermarket |
| LAHISPHALFSHARE | Share of tract population that are of Hispanic or Latino ethnicity beyond 1/2 mile from supermarket |
| LAHUNV10SHARE | Share of tract housing units that are without vehicle and beyond 10 miles from supermarket |
| LAHUNV1SHARE | Share of tract housing units that are without vehicle and beyond 1 mile from supermarket |
| LAHUNV20SHARE | Share of tract housing units that are without vehicle and beyond 20 miles from supermarket |
| LAHUNVHALFSHARE | Share of tract housing units that are without vehicle and beyond 1/2 mile from supermarket |
| LAKIDS10SHARE | Share of tract population that are kids beyond 10 miles from supermarket |
| LAKIDS1SHARE | Share of tract population that are kids beyond 1 mile from supermarket |
| LAKIDS20SHARE | Share of tract population that are kids beyond 20 miles from supermarket |
| LAKIDSHALFSHARE | Share of tract population that are kids beyond 1/2 mile from supermarket |
| LALOWI10SHARE | Share of tract population that are low income individuals beyond 10 miles from supermarket |
| LALOWI1SHARE | Share of tract population that are low income individuals beyond 1 mile from supermarket |
| LALOWI20SHARE | Share of tract population that are low income individuals beyond 20 miles from supermarket |
| LALOWIHALFSHARE | Share of tract population that are low income individuals beyond 1/2 mile from supermarket |
| LANHOPI10SHARE | Share of tract population that are Native Hawaiian or Other Pacific Islander beyond 10 miles from supermarket |
| LANHOPI1SHARE | Share of tract population that are Native Hawaiian or Other Pacific Islander beyond 1 mile from supermarket |
| LANHOPI20SHARE | Share of tract population that are Native Hawaiian or Other Pacific Islander beyond 20 miles from supermarket |
| LANHOPIHALFSHARE | Share of tract population that are Native Hawaiian or Other Pacific Islander beyond 1/2 mile from supermarket |
| LAOMULTIR10SHARE | Share of tract population that are Other/Multiple race beyond 10 miles from supermarket |
| LAOMULTIR1SHARE | Share of tract population that are Other/Multiple race beyond 1 mile from supermarket |
| LAOMULTIR20SHARE | Share of tract population that are Other/Multiple race beyond 20 miles from supermarket |
| LAOMULTIRHALFSHARE | Share of tract population that are Other/Multiple race beyond 1/2 mile from supermarket |
| LAPOP10SHARE | Share of tract population that are beyond 10 miles from supermarket |
| LAPOP1SHARE | Share of tract population that are beyond 1 mile from supermarket |
| LAPOP20SHARE | Share of tract population that are beyond 20 miles from supermarket |
| LAPOPHALFSHARE | Share of tract population that are beyond 1/2 mile from supermarket |
| LASENIORS10SHARE | Share of tract population that are seniors beyond 10 miles from supermarket |
| LASENIORS1SHARE | Share of tract population that are seniors beyond 1 mile from supermarket |
| LASENIORS20SHARE | Share of tract population that are seniors beyond 20 miles from supermarket |
| LASENIORSHALFSHARE | Share of tract population that are seniors beyond 1/2 mile from supermarket |
| LASNAP10SHARE | Share of tract housing units receiving SNAP benefits count beyond 10 miles from supermarket |
| LASNAP1SHARE | Share of tract housing units receiving SNAP benefits count beyond 1 mile from supermarket |
| LASNAP20SHARE | Share of tract housing units receiving SNAP benefits count beyond 20 miles from supermarket |
| LASNAPHALFSHARE | Share of tract housing units receiving SNAP benefits count beyond 1/2 mile from supermarket |
| LATRACTS_HALF | Flag for low access tract when considering 1/2 mile distance |
| LATRACTS1 | Flag for low access tract when considering 1 mile distance |
| LATRACTS10 | Flag for low access tract when considering 10 mile distance |
| LATRACTS20 | Flag for low access tract when considering 20 mile distance |
| LATRACTSVEHICLE_20 | Flag for tract where >= 100 of households do not have a vehicle, and beyond 1/2 mile from supermarket; or >= 500 individuals are beyond 20 miles from supermarket ; or >= 33% of individuals are beyond 20 miles from supermarket |
| LAWHITE10SHARE | Share of tract population that are white beyond 10 miles from supermarket |
| LAWHITE1SHARE | Share of tract population that are white beyond 1 mile from supermarket |
| LAWHITE20SHARE | Share of tract population that are white beyond 20 miles from supermarket |
| LAWHITEHALFSHARE | Share of tract population that are white beyond 1/2 mile from supermarket |
| LILATRACTS_1AND10 | Flag for low-income and low access when considering low accessibilty at 1 and 10 miles |
| LILATRACTS_1AND20 | Flag for low-income and low access when considering low accessibilty at 1 and 20 miles |
| LILATRACTS_HALFAND10 | Flag for low-income and low access when considering low accessibilty at 1/2 and 10 miles |
| LILATRACTS_VEHICLE | Flag for low-income and low access when considering vehicle access or at 20 miles |
| LOWINCOMETRACTS | Flag for low income tract |
| MEDIANFAMILYINCOME | Tract median family income |
| OHU2010 | Occupied housing unit count from 2010 census |
| POVERTYRATE | Share of the tract population living with income at or below the Federal poverty thresholds for family size |
| URBAN | Flag for urban tract |

**Smart Location Map Database (SLM) – Neighborhood and Built environment (NE)**

| **Variable** | **Description** |
| --- | --- |
| AC_LAND | Total land area (acres) |
| AC_TOTAL | Total geometric area (acres) of the CBG 2019 |
| AC_UNPR | Total land area (acres) that is not protected from development (i.e. |
| AC_WATER | Total water area (acres) |
| AUTOOWN0 | Number of households in CBG that own zero automobiles |
| AUTOOWN1 | Number of households in CBG that own one automobile |
| AUTOOWN2P | Number of households in CBG that own two or more automobiles |
| CBSA_EMP | Total employment in CBSA 2017 |
| CBSA_NAME | Name of CBSA in which CBG resides |
| CBSA_WRK | Total number of workers that live in CBSA 2017 |
| COUNTHU | Housing units |
| D1_FLAG | Flag indicating that density metrics are based on total CBG land acreage rather than unprotected acreage |
| D1A | Gross residential density (HU/acre) on unprotected land |
| D1B | Gross population density (people/acre) on unprotected land |
| D1C | Gross employment density (jobs/acre) on unprotected land |
| D1C5_ENT | Gross entertainment (5-tier) employment density (jobs/acre) on unprotected land |
| D1C5_IND | Gross industrial (5-tier) employment density (jobs/acre) on unprotected land |
| D1C5_OFF | Gross office (5-tier) employment density (jobs/acre) on unprotected land |
| D1C5_RET | Gross retail (5-tier) employment density (jobs/acre) on unprotected land |
| D1C5_SVC | Gross service (5-tier) employment density (jobs/acre) on unprotected land |
| D1C8_ED | Gross education(8-tier) employment density (jobs/acre) on unprotected land |
| D1C8_ENT | Gross entertainment (8-tier) employment density (jobs/acre) on unprotected land |
| D1C8_HLTH | Gross health care (8-tier) employment density (jobs/acre) on unprotected land |
| D1C8_IND | Gross industrial (8-tier) employment density (jobs/acre) on unprotected land |
| D1C8_OFF | Gross office (8-tier) employment density (jobs/acre) on unprotected land |
| D1C8_PUB | Gross retail (8-tier) employment density (jobs/acre) on unprotected land |
| D1C8_RET | Gross retail (8-tier) employment density (jobs/acre) on unprotected land |
| D1C8_SVC | Gross service (8-tier) employment density (jobs/acre) on unprotected land |
| D1D | Gross activity density (employment + HUs) on unprotected land |
| D2A_EPHHM | Employment and household entropy |
| D2A_JPHH | Jobs per household |
| D2A_RANKED | Quantile ranked order (1-20) of [D2a_EpHHm] from lowest to highest |
| D2A_WRKEMP | Household Workers per Job |
| D2B_E5MIX | 5-tier employment entropy (denominator set to observed employment types in the CBG) |
| D2B_E5MIXA | 5-tier employment entropy (denominator set to the static 5 employment types in the CBG) |
| D2B_E8MIX | 8-tier employment entropy (denominator set to observed employment types in the CBG) |
| D2B_E8MIXA | 8-tier employment entropy (denominator set to the static 8 employment types in the CBG) |
| D2B_RANKED | Quantile ranked order (1-20) of [D2b_E8MixA] from lowest to highest |
| D2C_TRIPEQ | Trip productions and trip attractions equilibrium index; the closer to one |
| D2C_TRPMX1 | Employment and Household entropy (based on vehicle trip production and trip attractions including all 5 employment categories) |
| D2C_TRPMX2 | Employment and Household Entropy calculations |
| D2R_JOBPOP | Regional Diversity. Standard calculation based on population and total employment: Deviation of CBG ratio of jobs/pop from the regional average ratio of jobs/pop |
| D2R_WRKEMP | Household Workers per Job |
| D3A | Total road network density |
| D3AAO | Network density in terms of facility miles of auto-oriented links per square mile |
| D3AMM | Network density in terms of facility miles of multi-modal links per square mile |
| D3APO | Network density in terms of facility miles of pedestrian-oriented links per square mile |
| D3B | Street intersection density (weighted) |
| D3B_RANKED | Quantile ranked order (1-20) of [D3b] from lowest to highest |
| D3BAO | Intersection density in terms of auto-oriented intersections per square mile |
| D3BMM3 | Intersection density in terms of multi-modal intersections having three legs per square mile |
| D3BMM4 | Intersection density in terms of multi-modal intersections having four or more legs per square mile |
| D3BPO3 | Intersection density in terms of pedestrian-oriented intersections having three legs per square mile |
| D3BPO4 | Intersection density in terms of pedestrian-oriented intersections having four or more legs per square mile |
| D4A | Distance from the population-weighted centroid to nearest transit stop (meters) |
| D4A_RANKED | Quantile ranked order (1-20) of [D4a] from lowest to highest |
| D4B025 | Proportion of CBG employment within 1/4 mile of fixed-guideway transit stop |
| D4B050 | Proportion of CBG employment within 1/2 mile of fixed-guideway transit stop |
| D4C | Aggregate frequency of transit service within 0.25 miles of CBG boundary per hour during evening peak period |
| D4D | Aggregate frequency of transit service [D4c] per square mile |
| D4E | Aggregate frequency of transit service [D4c] per capita |
| D5AE | Working age population within 45 minutes auto travel time |
| D5AR | Jobs within 45 minutes auto travel time |
| D5BE | Working age population within 45-minute transit commute |
| D5BR | Jobs within 45-minute transit commute |
| D5CE | Proportional Accessibility to Regional Destinations - Auto: Working age population accessibility expressed as a ratio of total CBSA accessibility |
| D5CEI | Regional Centrality Index â€“ Auto: CBG [D5ce] score relative to max CBSA [D5ce] score |
| D5CR | Proportional Accessibility to Regional Destinations - Auto: Employment accessibility expressed as a ratio of total CBSA accessibility |
| D5CRI | Regional Centrality Index â€“ Auto: CBG [D5cr] score relative to max CBSA [D5cr] score |
| D5DE | Proportional Accessibility of Regional Destinations - Transit: Working age population accessibility expressed as a ratio of total MSA accessibility |
| D5DEI | Regional Centrality Index â€“ Transit: CBG [D5de] score relative to max CBSA [D5de] score |
| D5DR | Proportional Accessibility of Regional Destinations - Transit: Employment accessibility expressed as a ratio of total MSA accessibility |
| D5DRI | Regional Centrality Index â€“ Transit: CBG [D5dr] score relative to max CBSA [D5dr] score |
| E_HIWAGEWK | # of workers earning $3333/month or more (work location) |
| E_LOWWAGEWK | # of workers earning $1250/month or less (work location) |
| E_MEDWAGEWK | # of workers earning more than $1250/month but less than $3333/month (work location) |
| E_PCTLOWWAGE | % LowWageWk of total #workers in a CBG (work location) |
| E5_ENT | Entertainment jobs within a 5-tier employment classification scheme (LEHD: CNS17 + CNS18) |
| E5_IND | Industrial jobs within a 5-tier employment classification scheme (LEHD: CNS01 + CNS02 + CNS03 + CNS04 + CNS05 + CNS06 + CNS08) |
| E5_OFF | Office jobs within a 5-tier employment classification scheme (LEHD: CNS09 + CNS10 + CNS11 + CNS13 + CNS20) |
| E5_RET | Retail jobs within a 5-tier employment classification scheme (LEHD: CNS07) |
| E5_SVC | Service jobs within a 5-tier employment classification scheme (LEHD: CNS12 + CNS14 + CNS15 + CNS16 + CNS19) |
| E8_ED | Education jobs within an 8-tier employment classification scheme (LEHD: CNS15) |
| E8_ENT | Entertainment jobs within an 8-tier employment classification scheme (LEHD: CNS17 + CNS18) |
| E8_HLTH | Health care jobs within an 8-tier employment classification scheme (LEHD: CNS16) |
| E8_IND | Industrial jobs within an 8-tier employment classification scheme (LEHD: CNS01 + CNS02 + CNS03 + CNS04 + CNS05 + CNS06 + CNS08) |
| E8_OFF | Office jobs within an 8-tier employment classification scheme (LEHD: CNS09 + CNS10 + CNS11 + CNS13) |
| E8_PUB | Public administration jobs within an 8-tier employment classification scheme (LEHD: CNS20) |
| E8_RET | Retail jobs within an 8-tier employment classification scheme (LEHD: CNS07) |
| E8_SVC | Service jobs within an 8-tier employment classification scheme (LEHD: CNS12 + CNS14 + CNS19) |
| HH | Households (occupied housing units) |
| NATWALKIND | Walkability index comprised of a weighted sum of the ranked values of [D2a_EpHHm] (D2A_Ranked) |
| P_WRKAGE | Percent of population that is working aged 18 to 64 years |
| PCT_AO0 | Percent of zero-car households in CBG |
| PCT_AO1 | Percent of one-car households in CBG |
| PCT_AO2P | Percent of two-plus-car households in CBG |
| R_PCTLOWWAGE | Percent of low wage workers in a CBG (home location) |
| WORKERS | Count of workers in CBG (home location) |

**Social Vulnerability Index (SVI) – Social and Community Context (SC)**

| **Variable** | **Description** |
| --- | --- |
| EP_AFAM | Adjunct variable - Percentage of Black/African American, not Hispanic or Latino persons estimate, 2016-2020 ACS |
| EP_AGE17 | Percentage of persons aged 17 and younger estimate, 2016-2020 ACS |
| EP_AGE65 | Percentage of persons aged 65 and older estimate, 2016-2020 ACS |
| EP_AIAN | Adjunct variable - Percentage of American Indian or Alaska Native, not Hispanic or Latino persons estimate, 2016-2020 ACS |
| EP_ASIAN | Adjunct variable - Percentage of Asian, not Hispanic or Latino persons estimate, 2016-2020 ACS |
| EP_CROWD | Percentage of occupied housing units with more people than rooms estimate |
| EP_DISABL | Percentage of civilian noninstitutionalized population with a disability estimate, 2016-2020 ACS |
| EP_GROUPQ | Percentage of persons in group quarters estimate, 2016-2020 ACS |
| EP_HBURD | Percentage of housing cost-burdened occupied housing units with annual income less than $75,000 (30%+ of income spent on housing costs) estimate, 2016-2020 ACS estimate, 2016-2020 ACS |
| EP_HISP | Adjunct variable - Percentage of Hispanic or Latino persons estimate, 2016-2020 ACS |
| EP_LIMENG | Percentage of persons (age 5+) who speak English "less than well" estimate, 2016-2020 ACS |
| EP_MINRTY | Percentage minority (Hispanic or Latino (of any race); Black and African American, Not Hispanic or Latino; American Indian and Alaska Native, Not Hispanic or Latino; Asian, Not Hispanic or Latino; Native Hawaiian and Other Pacific Islander, Not Hispanic or Latino; Two or More Races, Not Hispanic or Latino; Other Races, Not Hispanic or Latino) estimate, 2016-2020 ACS |
| EP_MOBILE | Percentage of mobile homes estimate |
| EP_MUNIT | Percentage of housing in structures with 10 or more units estimate |
| EP_NHPI | Adjunct variable - Percentage of Native Hawaiian or Other Pacific Islander, not Hispanic or Latino persons estimate, 2016-2020 ACS |
| EP_NOHSDP | Percentage of persons with no high school diploma (age 25+) estimate |
| EP_NOINT | Adjunct variable - Percentage of households without a computer with a broadband Internet subscription estimate, 2016-2020 ACS |
| EP_NOVEH | Percentage of households with no vehicle available estimate |
| EP_OTHERRACE | Adjunct variable - Percentage of some other race, not Hispanic or Latino persons estimate, 2016-2020 ACS |
| EP_POV150 | Percentage of persons below 150% poverty estimate |
| EP_SNGPNT | Percentage of single-parent households with children under 18 estimate, 2016-2020 ACS |
| EP_TWOMORE | Adjunct variable - Percentage of two or more races, not Hispanic or Latino persons estimate, 2016-2020 ACS |
| EP_UNEMP | Unemployment Rate estimate |
| EP_UNINSUR | Percentage uninsured in the total civilian noninstitutionalized population estimate, 2016-2020 ACS |
| EPL_AGE17 | Percentile percentage of persons aged 17 and younger estimate |
| EPL_AGE65 | Percentile percentage of persons aged 65 and older estimate |
| EPL_CROWD | Percentile percentage households with more people than rooms estimate |
| EPL_DISABL | Percentile percentage of civilian noninstitutionalized population with a disability estimate |
| EPL_GROUPQ | Percentile percentage of persons in group quarters estimate |
| EPL_HBURD | Percentile percentage of housing cost-burdened occupied housing units estimate |
| EPL_LIMENG | Percentile percentage of persons (age 5+) who speak English "less than well" estimate |
| EPL_MINRTY | Percentile percentage minority (Hispanic or Latino (of any race); Black and African American, Not Hispanic or Latino; American Indian and Alaska Native, Not Hispanic or Latino; Asian, Not Hispanic or Latino; Native Hawaiian and Other Pacific Islander, Not Hispanic or Latino; Two or More Races, Not Hispanic or Latino; Other Races, Not Hispanic or Latino) estimate |
| EPL_MOBILE | Percentile percentage mobile homes estimate |
| EPL_MUNIT | Percentile percentage housing in structures with 10 or more units estimate |
| EPL_NOHSDP | Percentile percentage of persons with no high school diploma (age 25+) estimate |
| EPL_NOVEH | Percentile percentage households with no vehicle available estimate |
| EPL_POV150 | Percentile percentage of persons below 150% poverty estimate |
| EPL_SNGPNT | Percentile percentage of single-parent households with children under 18 estimate |
| EPL_UNEMP | Percentile percentage of civilian (age 16+) unemployed estimate |
| EPL_UNINSUR | Percentile percentage of uninsured estimate |
| F_AGE17 | Flag - the percentage of persons aged 17 and younger is in the 90th percentile (1 = yes, 0 = no) |
| F_AGE65 | Flag - the percentage of persons aged 65 and older is in the 90th percentile (1 = yes, 0 = no) |
| F_CROWD | Flag - the percentage of crowded households is in the 90th percentile (1 = yes, 0 = no) |
| F_DISABL | Flag - the percentage of persons with a disability is in the 90th percentile (1 = yes, 0 = no) |
| F_GROUPQ | Flag - the percentage of persons in group quarters is in the 90th percentile (1 = yes, 0 = no) |
| F_HBURD | Flag - the percentage of housing cost-burdened occupied housing units is in the 90th percentile (1 = yes, 0 = no) |
| F_LIMENG | Flag - the percentage those with limited English is in the 90th percentile (1 = yes, 0 = no) |
| F_MINRTY | Flag - the percentage of minority is in the 90th percentile (1 = yes, 0 = no) |
| F_MOBILE | Flag - the percentage of mobile homes is in the 90th percentile (1 = yes, 0 = no) |
| F_MUNIT | Flag - the percentage of households in multi-unit housing is in the 90th percentile (1 = yes, 0 = no) |
| F_NOHSDP | Flag - the percentage of persons with no high school diploma is in the 90th percentile (1 = yes, 0 = no) |
| F_NOVEH | Flag - the percentage of households with no vehicles is in the 90th percentile (1 = yes, 0 = no) |
| F_POV150 | Flag - the percentage of persons below 150% poverty is in the 90th percentile (1 = yes, 0 = no) |
| F_SNGPNT | Flag - the percentage of single-parent households is in the 90th percentile (1 = yes, 0 = no) |
| F_THEME1 | Sum of flags for Socioeconomic Status theme |
| F_THEME2 | Sum of flags for Household Characteristics theme |
| F_THEME3 | Sum of flags for Racial and Ethnic Minority Status theme |
| F_THEME4 | Sum of flags for Housing Type/ Transportation theme |
| F_TOTAL | Sum of flags for the four themes |
| F_UNEMP | Flag - the percentage of civilian unemployed is in the 90th percentile (1 = yes, 0 = no) |
| F_UNINSUR | Flag - the percentage of uninsured is in the 90th percentile (1 = yes, 0 = no) |
| RPL_THEME1 | Percentile ranking for Socioeconomic Status theme summary |
| RPL_THEME2 | Percentile ranking for Household Characteristics theme summary |
| RPL_THEME3 | Percentile ranking for Racial and Ethnic Minority Status theme |
| RPL_THEME4 | Percentile ranking for Housing Type/ Transportation theme |
