# Supplementary material for: Enriching Electronic Health Records with Social Determinants of Health Data from Consumer Database: A Comparative Fit-for-Use Study
Source: Research Square preprint supplement (doi:10.21203/rs.3.rs-5349886/v1), 2025-03-21
Supplement: Supplementary file 6 [file ea613ddc8fada1d4867a26cf.docx]

## SUPPLEMENTAL APPENDIX E – Individual and Household Characteristics of the Cohort

| **Variables** | **All** | **With  readmission** | **Without readmission** | **P-value** |
| --- | --- | --- | --- | --- |
| N | 67,806 | 7,161 | 60,645 |  |
| **Individual Characteristics (EHR)** | | | | |
| **Age** | | | | |
| Age, mean (sd) | 51 (17.0) | 52 (15.7) | 51 (17.1) | < 0.001 |
| **Sex, n(%)** | | | | |
| Female | 40,770 (60.1%) | 3,921 (54.8%) | 36,849 (60.8%) | < 0.001 |
| Male | 27,036 (39.9%) | 3,240 (45.2%) | 23,796 (39.2%) |
| **Race, n(%)** | | | | |
| White | 58,190 (85.8%) | 5,976 (83.4%) | 52,214 (86.1%) | < 0.001 |
| Black or African American | 7,115 (10.5%) | 959 (13.4%) | 6,156 (10.2%) |
| Asian | 544 (0.8%) | 22 (0.3%) | 522 (0.9%) |
| American Indian or Alaska Native | 159 (0.2%) | 18 (0.2%) | 141 (0.2%) |
| Other | 1,262 (1.9%) | 125 (1.8%) | 1,137 (1.9%) |
| Unknown | 536 (0.8%) | 61 (0.9%) | 475 (0.8%) |
| **Ethnicity** | | | | |
| Hispanic | 1,194 (2%) | 154 (2.1%) | 1,194 (2%) | 0.264 |
| Non-Hispanic | 55,310 (91.2%) | 6,547 (91.4%) | 55,310 (91.2%) |
| Unknown | 4,141 (6.8%) | 460 (6.4%) | 4,141 (6.8%) |
| **CCI Class** | | | | |
| None (0) | 17,021 (28.1%) | 906 (12.7%) | 17,021 (28.1%) | < 0.001 |
| Mild (1 – 2) | 18,900 (31.2%) | 1,797 (25.1%) | 18,900 (31.2%) |
| Moderate (3 – 4) | 10,036 (16.6%) | 1,408 (19.7%) | 10,036 (16.6%) |
| Severe ( 5) | 14,688 (24.2%) | 3,050 (42.6%) | 14,688 (24.2%) |
| **Obesity (BMI >= 30), n(%)** | | | | |
| Yes | 45,707 (67.4%) | 4,976 (69.5%) | 40,731 (67.2%) | < 0.001 |
| No | 22,099 (32.6%) | 2,185 (30.5%) | 19,914 (32.8%) |
| **Primary Payer, n(%)** | | | | |
| Medicare | 24,791 (36.6%) | 3,025 (42.2%) | 21,766 (35.9%) | < 0.001 |
| Medicaid | 12,002 (17.7%) | 1,923 (26.9%) | 10,079 (16.6%) |
| Commercial | 21,301 (31.4%) | 1,404 (19.6%) | 19,897 (32.8%) |
| Government | 3,483 (5.1%) | 215 (3%) | 3,268 (5.4%) |
| No payment | 5,179 (7.6%) | 533 (7.4%) | 4,646 (7.7%) |
| Other | 1,050 (1.6%) | 61 (0.9%) | 989 (1.6%) |
| **Dual Eligibility** | | | | |
| Yes | 9,911 (14.6%) | 1,584 (22.1%) | 8,327 (13.7%) | < 0.001 |
| No | 57,895 (85.4%) | 5,577 (77.9%) | 52,318 (86.3%) |
| **LOS** | | | | |
| LOS, median (Q1, Q3) | 2 (1,4) | 3 (2,5) | 2 (1,4) | < 0.001 |
| **Admitting Source** | | | | |
| Emergency Department | 35885 (52.9%) | 4774 (66.7%) | 31111 (51.3%) | < 0.001 |
| Other | 31921 (47.1%) | 2387 (33.3%) | 29534 (48.7%) |
| **Individual Characteristics (Consumer Data)** | | | | |
| **Country of Origin** | | | | |
| England | 25818 (38.1%) | 2447 (34.2%) | 23371 (38.5%) | < 0.001 |
| Germany | 6818 (10.1%) | 584 (8.2%) | 6234 (10.3%) |
| White | 5992 (8.8%) | 532 (7.4%) | 5460 (9%) |
| Scotland | 4250 (6.3%) | 445 (6.2%) | 3805 (6.3%) |
| African American | 3397 (5%) | 370 (5.2%) | 3027 (5%) |
| Ireland | 3281 (4.8%) | 352 (4.9%) | 2929 (4.8%) |
| Hispanic | 2145 (3.2%) | 254 (3.5%) | 1891 (3.1%) |
| Denmark | 1238 (1.8%) | 116 (1.6%) | 1122 (1.8%) |
| France | 940 (1.4%) | 79 (1.1%) | 861 (1.4%) |
| Wales | 743 (1.1%) | 71 (1%) | 672 (1.1%) |
| Other | 2354 (3.3%) | 233 (3.1%) | 212 (3.2%) |
| NI | 10809 (15.9%) | 1675 (23.4%) | 9134 (15.1%) |
| **Hispanic Language Preference** | | | | |
| Non-Hispanic | 54831 (80.9%) | 5229 (73%) | 49602 (81.8%) | < 0.001 |
| Does Not Speak Spanish | 1170 (1.7%) | 128 (1.8%) | 1042 (1.7%) |
| Prefers Spanish | 651 (1%) | 83 (1.2%) | 568 (0.9%) |
| Bilingual Spanish and English | 324 (0.5%) | 43 (0.6%) | 281 (0.5%) |
| NI | 10809 (15.9%) | 1675 (23.4%) | 9134 (15.1%) |
| **Ethnic Group** | | | | |
| White | 46150 (68.1%) | 4292 (59.9%) | 41858 (69%) | < 0.001 |
| Black / African American | 2069 (3%) | 209 (2.9%) | 1860 (3.1%) |
| Hispanic | 1619 (2.4%) | 186 (2.6%) | 1433 (2.4%) |
| Other | 1335 (1.9%) | 136 (1.9%) | 1199 (2.0%) |
| NI | 16612 (24.5%) | 2335 (32.6%) | 14277 (23.5%) |
| **Education** | | | | |
| High School Graduate | 16637 (24.5%) | 1632 (22.8%) | 15005 (24.7%) | < 0.001 |
| Some College | 10302 (15.2%) | 921 (12.9%) | 9381 (15.5%) |
| College Graduate | 14799 (21.8%) | 1352 (18.9%) | 13447 (22.2%) |
| Graduate Degree | 5627 (8.3%) | 442 (6.2%) | 5185 (8.6%) |
| **Occupation** | | | | |
| Homemaker | 5547 (8.2%) | 596 (8.3%) | 4951 (8.2%) | < 0.001 |
| Professional/Technical | 5165 (7.6%) | 458 (6.4%) | 4707 (7.8%) |
| Craftsman/Blue Collar | 5078 (7.5%) | 509 (7.1%) | 4569 (7.5%) |
| Administration/Managerial | 3632 (5.4%) | 343 (4.8%) | 3289 (5.4%) |
| Clerical/White Collar | 3362 (5.0%) | 274 (3.8%) | 3088 (5.1%) |
| Retired | 3216 (4.7%) | 309 (4.3%) | 2907 (4.8%) |
| Medical Professional | 2570 (3.8%) | 221 (3.1%) | 2349 (3.9%) |
| Sales/Service | 1207 (1.8%) | 126 (1.8%) | 1081 (1.8%) |
| Other | 5402 (8.9%) | 528 (7.4%) | 4874 (8.0%) |
| **Political Party** | | | | |
| Voter - Democratic | 14580 (21.5%) | 1446 (20.2%) | 13134 (21.7%) | < 0.001 |
| Voter - Republican | 8541 (12.6%) | 801 (11.2%) | 7740 (12.8%) |
| Voter - Independent | 9042 (13.3%) | 813 (11.3%) | 8229 (13.6%) |
| Voter - No Party | 3928 (5.8%) | 331 (4.6%) | 3597 (5.9%) |
| NI | 31694 (46.7%) | 3767 (52.6%) | 27927 (46.1%) |
| **Data Prominence** | | | | |
| Email Available Indicator | 54698 (80.7%) | 5349 (74.7%) | 49349 (81.4%) | < 0.001 |
| Consumer Prominence Indicator, mean (sd) | 5.5 (2.3) | 5.1 (2.3) | 5.5 (2.3) | < 0.001 |
| **Household Characteristics (Consumer Data)** | | | | |
| **Behavior and Lifestyle, n(%)** | | | | |
| Exercise/Health Grouping | 49852 (73.5%) | 4803 (67.1%) | 45049 (74.3%) | < 0.001 |
| Exercise - Running/Jogging | 7961 (11.7%) | 709 (9.9%) | 7252 (12%) | < 0.001 |
| Exercise - Walking | 24484 (36.1%) | 2287 (31.9%) | 22197 (36.6%) | < 0.001 |
| Health - Organic Food Focus | 6529 (9.6%) | 585 (8.2%) | 5944 (9.8%) | < 0.001 |
| Health - Diabetic Interest | 9223 (13.6%) | 907 (12.7%) | 8316 (13.7%) | 0.0145 |
| Health - Cholesterol Focus | 8574 (12.6%) | 841 (11.7%) | 7733 (12.8%) | 0.0185 |
| Health - Homeopathic Interest | 20445 (30.1%) | 1854 (25.9%) | 18591 (30.7%) | < 0.001 |
| Health Enthusiasts | 40889 (60.3%) | 3920 (54.7%) | 36969 (61%) | < 0.001 |
| Religious/Inspirational | 18748 (27.7%) | 1810 (25.3%) | 16938 (27.9%) | < 0.001 |
| Sports Grouping | 47541 (70.1%) | 4522 (63.1%) | 43019 (70.9%) | < 0.001 |
| Fitness Warriors | 19193 (28.3%) | 1594 (22.3%) | 17599 (29%) | < 0.001 |
| Fitness Trackers | 8780 (13%) | 742 (10.4%) | 8038 (13.2%) | < 0.001 |
| Boating/Sailing | 14112 (20.8%) | 1274 (17.8%) | 12838 (21.2%) | < 0.001 |
| Hunting/Shooting | 35020 (51.6%) | 3213 (44.9%) | 31807 (52.4%) | < 0.001 |
| Fishing | 39545 (58.3%) | 3870 (54%) | 35675 (58.8%) | < 0.001 |
| Biking/Mountain Biking | 6786 (10%) | 635 (8.9%) | 6151 (10.1%) | 0.0025 |
| Motorcycling | 6880 (10.2%) | 682 (9.5%) | 6198 (10.2%) | 0.0635 |
| Snow Skiing | 3968 (5.9%) | 340 (4.8%) | 3628 (6%) | < 0.001 |
| Camping/Hiking | 29437 (43.4%) | 2772 (38.7%) | 26665 (44%) | < 0.001 |
| Causes supported financially |  |  |  |  |
| Political | 33273 (49.1%) | 3000 (41.9%) | 30273 (49.9%) | < 0.001 |
| Children | 17446 (25.7%) | 1775 (24.8%) | 15671 (25.8%) | < 0.001 |
| Veterans | 11980 (17.7%) | 1158 (16.2%) | 10822 (17.8%) | < 0.001 |
| Environment or Wildlife | 15491 (22.9%) | 1417 (19.8%) | 14074 (23.2%) | < 0.001 |
| Politically Liberal | 3897 (5.8%) | 335 (4.7%) | 3562 (5.9%) | < 0.001 |
| Politically Conservative | 20184 (29.8%) | 1749 (24.4%) | 18435 (30.4%) | < 0.001 |
| Charitable | 44580 (65.8%) | 4169 (58.2%) | 40411 (66.6%) | < 0.001 |
| Religious | 15067 (22.2%) | 1390 (19.4%) | 13677 (22.6%) | < 0.001 |
| International Aid | 2502 (3.7%) | 255 (3.6%) | 2247 (3.7%) | 0.5667 |
| Arts or Cultural | 1262 (1.9%) | 114 (1.6%) | 1148 (1.9%) | 0.077 |
| Health | 21847 (32.2%) | 2130 (29.7%) | 19717 (32.5%) | < 0.001 |
| Animal Welfare | 14077 (20.8%) | 1419 (19.8%) | 12658 (20.9%) | 0.0385 |
| Outdoors Grouping | 50698 (74.8%) | 4927 (68.8%) | 45771 (75.5%) | < 0.001 |
| Dieting/Weight Loss | 29889 (44.1%) | 2906 (40.6%) | 26983 (44.5%) | < 0.001 |
| Cooking - Low Fat | 18746 (27.7%) | 1784 (24.9%) | 16962 (28%) | < 0.001 |
| Cooking - Calorie Conscious | 25239 (37.2%) | 2435 (34%) | 22804 (37.6%) | < 0.001 |
| Food - Wines | 10678 (15.8%) | 1018 (14.2%) | 9660 (15.9%) | < 0.001 |
| Food - Vegetarian | 1508 (2.2%) | 156 (2.2%) | 1352 (2.2%) | 0.7846 |
| Food - Natural | 16758 (24.7%) | 1541 (21.5%) | 15217 (25.1%) | < 0.001 |
| Vehicle - Recreational Vehicle Owner | 12666 (18.7%) | 1074 (15%) | 11592 (19.1%) | < 0.001 |
| Vehicle - Truck Owner | 24832 (36.6%) | 2218 (31%) | 22614 (37.3%) | < 0.001 |
| Vehicle - Motorcycle Owner | 7963 (11.7%) | 650 (9.1%) | 7313 (12.1%) | < 0.001 |
| Career | 15838 (23.4%) | 1492 (20.8%) | 14346 (23.7%) | < 0.001 |
| Reading | 52040 (76.8%) | 5033 (70.3%) | 47007 (77.5%) | < 0.001 |
| Home Improvement | 52005 (76.7%) | 5025 (70.2%) | 46980 (77.5%) | < 0.001 |
| Smart Home Enthusiasts | 9431 (13.9%) | 798 (11.1%) | 8633 (14.2%) | < 0.001 |
| Dog owner | 34166 (50.4%) | 3211 (44.8%) | 30955 (51%) | < 0.001 |
| Cat owner | 27611 (40.7%) | 2513 (35.1%) | 25098 (41.4%) | < 0.001 |
| Self-Improvement | 19752 (29.1%) | 1863 (26%) | 17889 (29.5%) | < 0.001 |
| Green Living | 25887 (38.2%) | 2392 (33.4%) | 23495 (38.7%) | < 0.001 |
| Woodworking | 20480 (30.2%) | 1839 (25.7%) | 18641 (30.7%) | < 0.001 |
| Auto Work | 34705 (51.2%) | 3180 (44.4%) | 31525 (52%) | < 0.001 |
| Life Insurance Policy Owner | 16211 (23.9%) | 1436 (20%) | 14775 (24.4%) | < 0.001 |
| Smoking/Tobacco | 9048 (13.3%) | 1014 (14.2%) | 8034 (13.2%) | 0.0355 |
| Cigars | 5801 (8.6%) | 648 (9%) | 5153 (8.5%) | 0.1144 |
| Retail Purchases - Most Frequent Category |  |  |  | < 0.001 |
| Standard Retail, HiVol Low End Dpt Store | 6068 (8.9%) | 604 (8.4%) | 5464 (9%) |
| Standard Specialty, Specialty | 4833 (7.1%) | 445 (6.2%) | 4388 (7.2%) |
| Standard Retail, Standard Retail | 4285 (6.3%) | 338 (4.7%) | 3947 (6.5%) |
| Upscale Retail, Hi-end Retail Buyers | 2820 (4.2%) | 282 (3.9%) | 2538 (4.2%) |
| Upscale Specialty, Travel/Personal Services | 2404 (3.5%) | 218 (3%) | 2186 (3.6%) |
| Standard Specialty, Specialty Apparel | 2284 (3.4%) | 217 (3%) | 2067 (3.4%) |
| Standard Retail, Main Street Retail | 2124 (3.1%) | 225 (3.1%) | 1899 (3.1%) |
| Financial Svcs - Install Credit | 2088 (3.1%) | 213 (3%) | 1875 (3.1%) |
| Standard Specialty, Computer/Electronics | 1946 (2.9%) | 195 (2.7%) | 1751 (2.9%) |
| Standard Specialty, Home Improvement | 1632 (2.4%) | 254 (3.5%) | 1378 (2.3%) |
| Other | 2907 (4.3%) | 266 (3.7%) | 2641 (4.3%) |
| **Financial** | | | | |
| Income |  |  |  | < 0.001 |
| $30,000 - $39,999 | 9311 (13.7%) | 1073 (15%) | 8238 (13.6%) |
| $20,000 - $29,999 | 8833 (13%) | 1049 (14.6%) | 7784 (12.8%) |
| $40,000 - $49,999 | 8380 (12.4%) | 943 (13.2%) | 7437 (12.3%) |
| Less than $15,000 | 7457 (11%) | 901 (12.6%) | 6556 (10.8%) |
| $15,000 - $19,999 | 5514 (8.1%) | 562 (7.8%) | 4952 (8.2%) |
| $70,000 - $79,999 | 5384 (7.9%) | 456 (6.4%) | 4928 (8.1%) |
| $60,000 - $69,999 | 5218 (7.7%) | 521 (7.3%) | 4697 (7.8%) |
| $90,000 - $99,999 | 3957 (5.8%) | 309 (4.3%) | 3648 (6%) |
| $50,000 - $59,999 | 3740 (5.5%) | 453 (6.3%) | 3287 (5.4%) |
| Greater than $149,999 | 3642 (5.4%) | 321 (4.5%) | 3321 (5.5%) |
| $100,000 - $124,999 | 3370 (5%) | 241 (3.4%) | 3129 (5.2%) |
| $80,000 - $89,999 | 1984 (2.9%) | 248 (3.5%) | 1736 (2.9%) |
| $125,000 - $149,999 | 995 (1.5%) | 81 (1.1%) | 914 (1.5%) |
| Credit Card Indicator - Premium | 14077 (20.8%) | 1214 (17%) | 12863 (21.2%) | < 0.001 |
| Credit Card Indicator - Bank Card | 48179 (71%) | 4603 (64.3%) | 43576 (71.9%) | < 0.001 |
| Number of Lines of Credit, median (Q1, Q3) | 3 (2,4) | 3 (2,4) | 2 (1,4) | 0.1569 |
| Home Loan Amount Total |  |  |  | < 0.001 |
| $100,000 - $149,999 | 2545 (3.8%) | 188 (2.6%) | 2357 (3.9%) |
| $150,000 - $199,999 | 1749 (2.6%) | 104 (1.5%) | 1645 (2.7%) |
| $50,000 - $74,999 | 1086 (1.6%) | 78 (1.1%) | 1008 (1.7%) |
| $200,000 - $249,999 | 1054 (1.6%) | 60 (0.8%) | 994 (1.6%) |
| $75,000 - $99,999 | 1024 (1.5%) | 81 (1.1%) | 943 (1.6%) |
| Other | 3207 (4.5%) | 207 (2.8%) | 2650 (4.2%) |
| Total spending in past 2 years | 154 (55,476) | 157(64,509) | 153(54,470) | < 0.001 |
| Total online spending | 188 (67,546) | 178(75,563) | 189(65,544) | 0.7294 |
| **Social Support / Living Status** | | | | |
| Woman in the Workplace | 22405 (33%) | 1915 (26.7%) | 20490 (33.8%) |  |
| Number of Children, median (Q1, Q3) | 0 (0,1) | 0 (0,1) | 0 (0,1) | 0.500 |
| Number of Generations, median (Q1, Q3) | 1 (1,2) | 1 (1,2) | 1 (1,2) | 0.500 |
| Number of People, median (Q1, Q3) | 2 (1,3) | 2 (1,3) | 2 (1,3) | 0.500 |
| Single Parent | 9082 (13.4%) | 905 (12.6%) | 8177 (13.5%) | 0.051 |
| Veteran | 9865 (14.5%) | 922 (12.9%) | 8943 (14.8%) |  |
| Marital Status |  |  |  | < 0.001 |
| Inferred Married | 417 (0.6%) | 43 (0.6%) | 374 (0.6%) |
| Inferred Single | 3573 (5.3%) | 433 (6%) | 3140 (5.2%) |
| Married | 29929 (44.1%) | 2866 (40%) | 27063 (44.6%) |
| Single | 33866 (50%) | 3816 (53.3%) | 30050 (49.5%) |
| Number of owned vehicles, median (Q1, Q3) | 2 (1,3) | 2 (1,3) | 2 (1,3) | 0.7091 |
| **Home and Residence** | | | | |
| Home Ownership |  |  |  | < 0.001 |
| Rent | 26,536 (39.1%) | 37,513 (61.9%) | 3,422 (47.8%) |
| Own | 41,249 (60.9%) | 23,114 (38.1%) | 3,736 (52.2%) |
| Home Assessed Value (in K), median (Q1, Q3) | 20.6 (11.4, 32.1) | 18.9 (10.1, 30.0) | 20.8 (11.6, 32.3) | 0.775 |
| Home Equity (in K), median (Q1, Q3) | 77.6 (12.5, 136.9) | 69.6 (3.8, 13.2) | 77.9 (14.2, 137.0) | 0.055 |
| Home Build Year, median (Q1, Q3) | 1979 (1960, 1998) | 1979 (1960,1998) | 1977 (1958, 1997) | < 0.001 |
| Home Length of Residence, median (Q1, Q3) | 6 (2,15) | 6 (2,15) | 6 (2,15) | 0.500 |
| Address Length |  |  |  | < 0.001 |
| Greater than 14 Years | 5789 (8.5%) | 469 (6.6%) | 5320 (8.8%) |
| 10 - 14 Years | 2804 (4.1%) | 220 (3.1%) | 2584 (4.3%) |
| 6 - 7 Years | 2154 (3.2%) | 111 (1.6%) | 2043 (3.4%) |
| 8 - 9 Years | 1619 (2.4%) | 103 (1.4%) | 1516 (2.5%) |
| 5 Years | 1172 (1.7%) | 73 (1%) | 1099 (1.8%) |
| 3 Years | 1145 (1.7%) | 93 (1.3%) | 1052 (1.7%) |
| 4 Years | 1137 (1.7%) | 95 (1.3%) | 1042 (1.7%) |
| 2 Years | 1111 (1.6%) | 85 (1.2%) | 1026 (1.7%) |
| 1 Years | 1067 (1.6%) | 60 (0.8%) | 1007 (1.7%) |
| Less than 1 Year | 370 (0.5%) | 25 (0.4%) | 345 (0.6%) |
| Dwelling Type |  |  |  | < 0.001 |
| Single Family Dwelling Unit | 54283 (80.1%) | 5302 (74%) | 48981 (80.8%) |
| Multiple Family Dwelling Unit | 12666 (18.7%) | 1763 (24.6%) | 10903 (18%) |
| Home Roof Type |  |  |  | < 0.001 |
| Asphalt | 5477 (8.1%) | 492 (6.9%) | 4985 (8.2%) |
| Metal | 1338 (2%) | 96 (1.3%) | 1242 (2.1%) |
| Fiberglass | 1308 (1.9%) | 116 (1.6%) | 1192 (2%) |
| Other | 1004 (1.3%) | 82 (1%) | 922 (1.4%) |
| Home Property Type Detail |  |  |  | < 0.001 |
| Single Family Dwelling Unit | 28598 (42.2%) | 2489 (34.8%) | 26109 (43.0%) |
| Miscellaneous Residence (Combo Store/Flat) | 4793 (7.1%) | 348 (4.9%) | 4445 (7.3%) |
| Mobile Home | 2454 (3.6%) | 248 (3.5%) | 2206 (3.6%) |
| Other | 972 (1.5%) | 133 (1.9%) | 839 (1.4%) |
| Home Square Footage – Ranges (Real Property) |  |  |  | < 0.001 |
| 1,000 - 1,249 Feet | 5745 (8.5%) | 609 (8.5%) | 5136 (8.5%) |
| 1,250 - 1,499 Feet | 5465 (8.1%) | 435 (6.1%) | 5030 (8.3%) |
| 1,500 - 1,749 Feet | 5399 (8%) | 471 (6.6%) | 4928 (8.1%) |
| 2,000 - 2,499 Feet | 4743 (7%) | 365 (5.1%) | 4378 (7.2%) |
| 1,750 - 1,999 Feet | 3812 (5.6%) | 309 (4.3%) | 3503 (5.8%) |
| 750 - 999 Feet | 2811 (4.2%) | 269 (3.8%) | 2542 (4.2%) |
| 2,500 - 2,999 Feet | 2574 (3.8%) | 228 (3.2%) | 2346 (3.9%) |
| Other | 3379 (5.0%) | 3133 (5.1%) | 246 (3.3%) |
| Home Exterior (Real Property) |  |  |  | < 0.001 |
| Wood | 10014 (14.8%) | 903 (12.6%) | 9111 (15%) |
| Brick | 3658 (5.4%) | 283 (4%) | 3375 (5.6%) |
| Vinyl | 1281 (1.9%) | 96 (1.3%) | 1185 (2%) |
| Asbestos | 489 (0.7%) | 59 (0.8%) | 430 (0.7%) |
| Metal | 429 (0.6%) | 28 (0.4%) | 401 (0.7%) |
| Stucco | 427 (0.6%) | 39 (0.5%) | 388 (0.6%) |
| Other | 3133 (4.7%) | 306 (4.2a%) | 3403 (5.2%) |
